# Supplementary material for: Global, Regional, and National Burden of Idiopathic Epilepsy: Temporal Trends and Drivers from 1990 to 2021
Source: Research Square preprint supplement (doi:10.21203/rs.3.rs-7019365/v1), 2025-08-08
Supplement: Supplementary file 1 [file 0f8569aae3b8476216b6f344.xlsx]

## Sheet: Sheet1
age	Incidence (95% UI)			Deaths (95% UI)			DALYs (95% UI)
	Male	Female	Both	Male	Female	Both	Male	Female	Both
<1	62209.64 (41009.19–88185.88)	48300.09 (30717.63–68190.19)	110509.72 (72166.43–156344.22)	2357.87 (1505.72–3025.16)	1930.4 (1170.48–2570.46)	4288.27 (2968.06–5375.65)	255532.52 (176625.01–318200.28)	215433.71 (145140.62–274933.12)	470966.23 (348579.25–577811.39)
2-4	142513 (88794.01–212843.46)	117567.18 (71320.73–179221.62)	260080.18 (159911.3–392940.15)	1937.06 (1178.25–2545.16)	1164.06 (738.95–1557.04)	3101.12 (2011.46–4010.99)	374853.22 (275752.71–500080.32)	278555.34 (203826.28–386030.44)	653408.56 (487832.13–883329.54)
5-9	207648.94 (117712.35–323908.3)	182154 (101654.27–285492.29)	389802.94 (219288.88–606216.12)	2369.19 (1768.49–2878.94)	1402.61 (1013.48–1756.54)	3771.79 (2925.46–4446.89)	583288.4 (416910.16–838555.03)	450013.62 (310189.36–669932.61)	1033302.02 (732858.59–1502034.32)
10-14	197217.94 (116648.66–324769.2)	171789.14 (97207.63–285420.69)	369007.08 (214652.99–613077.23)	2934.49 (2259.87–3545.05)	2314.57 (1624.22–2879.34)	5249.06 (4212.2–6204.03)	621991.56 (446457.83–898245.05)	523815.1 (359665.57–779627.75)	1145806.66 (814993.35–1681110.81)
15-19	175497.2 (100124.35–272991.72)	147547.6 (80072.08–235376.87)	323044.79 (181524.7–509731.17)	5896.21 (4684.2–7521.15)	4030.53 (2879.73–5461.4)	9926.73 (8138.62–11739.95)	803880.42 (615855.37–1056454.67)	615818.39 (452683.8–841499.87)	1419698.81 (1083076.24–1878851.19)
20-24	147504.28 (77039.09–226082.25)	125802.8 (64593.55–200865.44)	273307.09 (140973.68–426800.14)	5816.59 (4539.78–7491.47)	3905.97 (2592.97–4742.66)	9722.56 (7753.75–11427.75)	743344.15 (562696.25–960791.11)	562788.5 (409214.57–752620.23)	1306132.64 (990158.36–1719727.44)
25-29	117358.83 (62798.37–178509.82)	104398.09 (53828.88–163040.09)	221756.92 (117170.94–342871.25)	5822 (4505.43–6806.32)	3320.5 (2241.32–4063.06)	9142.5 (7207.28–10541.03)	671162.3 (518611.53–854382.46)	474202.35 (340105.32–630012.79)	1145364.65 (870288.6–1469821.16)
30-34	104753.9 (52887.03–168580.69)	93904.15 (45941.52–152176.25)	198658.05 (98136.71–320145.1)	6091.55 (4689.24–7376.87)	3585.18 (2443.26–4300.13)	9676.73 (7857.28–11161.39)	622069.55 (484367.56–786345.94)	442361.81 (318688.94–581035.91)	1064431.35 (811900.35–1357296.53)
35-39	95068.05 (52046.99–145749.26)	84483.72 (44928.98–130445.11)	179551.77 (96657.41–276286.94)	6348.03 (4726.58–7438.09)	3235 (2296.17–3746.46)	9583.03 (7704.19–10718.71)	565874.26 (434794.72–715763.19)	370401.9 (268076.29–496339.89)	936276.16 (716623.46–1202001.48)
40-44	80642.81 (48823.27–128236.88)	72767.96 (42517.13–115371.5)	153410.78 (91251.29–244152.56)	5866.09 (4574.67–7035.54)	2885.56 (1994.6–3350.63)	8751.65 (7072.69–9810.58)	474383.51 (368812.55–606328.03)	305513.88 (219980.85–415406.58)	779897.38 (601564.31–1006996.94)
45-49	68993.56 (44587.2–104075.46)	64812.91 (41491.97–98002.61)	133806.47 (86494.04–202409.82)	5612.3 (4480.74–6735.03)	2277 (1640.64–2594.75)	7889.3 (6377.01–9110.75)	408766.59 (322669.79–513991.62)	247959.2 (176134.19–339660.4)	656725.78 (500344.25–846444.99)
50-54	61275.84 (35446.25–94480.62)	57852.98 (32980.87–89669.17)	119128.82 (68527.58–184462.92)	4693.44 (3658.6–5344.46)	2742.64 (1790.43–3191.09)	7436.08 (5926.77–8321.18)	327876.9 (255599.84–428506.78)	244662.03 (177911.58–345178.03)	572538.93 (438247.26–765839.12)
55-59	53589.28 (31415.93–91274.21)	49577.5 (28166.91–86955.84)	103166.78 (59783.27–177675.43)	4845.58 (3783.86–5530.04)	2762.57 (1855.26–3126.88)	7608.15 (5960.67–8350.33)	303733.99 (237972.38–399002.33)	228749.43 (165745.26–329941.25)	532483.42 (404392.71–734297.52)
60-64	44232.18 (25947.04–69714.86)	40382.24 (23280.45–65041.68)	84614.42 (49637.68–134342.36)	4205.57 (3370.02–4682.24)	2555.61 (1713.55–2889.72)	6761.18 (5473.95–7410.86)	257470.15 (192109.05–349635.72)	204959.73 (147098.23–292290.18)	462429.88 (341133.14–644524.89)
65-69	36958.03 (21567.5–54068.99)	34678.51 (19348.09–52098.2)	71636.54 (40471.44–106269.44)	4166.78 (3247.63–4688.87)	2998 (2038.12–3424.1)	7164.78 (5644.52–7864.92)	232890.96 (169931.01–318474.51)	201725.11 (146856.38–279874.78)	434616.07 (318593.95–595790.06)
70-74	30414.3 (17604.64–44249.42)	28874.39 (16219.87–42683.4)	59288.68 (33929.62–86669.45)	4052.19 (3159.97–4600.1)	3542.9 (2345–4052.75)	7595.09 (6012.96–8330.24)	189481.55 (137893.71–260524.31)	179286.62 (130049.28–246278.15)	368768.17 (273145.5–504604.06)
75-79	22880.82 (13307.27–34398.65)	22588.67 (12664.5–34415.02)	45469.49 (25935.71–68811.12)	3554.28 (2885.21–4054.14)	2772.73 (1984.66–3098.2)	6327.02 (5205.82–6910.18)	133548.79 (98595.88–183161.43)	124243.95 (87444.28–172742.67)	257792.74 (185337.5–356063.8)
80-84	17206.17 (10665.49–24887.84)	19550.75 (11637.03–28778)	36756.92 (22281.57–53820)	2869.77 (2382.35–3205.23)	2979.49 (2159.47–3382.48)	5849.25 (4740.68–6415.82)	89883.69 (64561.66–122249.25)	99457.88 (70311.46–136313.6)	189341.57 (135798.14–259033.63)
85-89	9763.4 (5358.28–15544.69)	13496.98 (7092.92–21937.37)	23260.38 (12476.89–37656.41)	2065.01 (1720.12–2308.59)	2562.73 (1843.8–2970.82)	4627.74 (3646.24–5173.42)	49505.9 (36357.98–67230.22)	64274.55 (45188.16–88642.66)	113780.46 (81519.24–156377.09)
90-94	4489.27 (2338.29–7342.48)	8379.12 (4211.2–14210.96)	12868.39 (6533.56–21569.32)	916.68 (781.01–1030.64)	1603.37 (1179.36–1868.24)	2520.06 (1983.54–2831)	19357.96 (13944.48–27176.92)	32984.35 (23391.43–45902.43)	52342.31 (37271.11–73185.96)
95+	1648.98 (658.64–3479.8)	4167.28 (1586.98–9158.56)	5816.26 (2258.2–12550.83)	309 (247.41–354.6)	788.93 (562.09–935.05)	1097.93 (808.51–1269.71)	6220.24 (4320.1–8942.26)	14490.02 (10133.75–20941.84)	20710.26 (14500.82–29863.01)
