# Supplementary material for: Global, Regional, and National Burden of Idiopathic Epilepsy: Temporal Trends and Drivers from 1990 to 2021
Source: Research Square preprint supplement (doi:10.21203/rs.3.rs-7019365/v1), 2025-08-08
Supplement: Supplementary file 2 [file 12ab8d8acc6227340f5d909f.xlsx]

## Sheet: 21regions_各指标各性别Number长转宽
location	Incidence_Number (95% UI)			Deaths_Number (95% UI)			DALYs_Number (95% UI)
	Both	Female	Male	Both	Female	Male	Both	Female	Male
Western Europe	260298.49 (164172.29-344964.91)	120886.54 (76844.33-162904.22)	139411.95 (85985.15-184245.16)	10905.39 (9547.79-11836.96)	5502.14 (4624.89-6128.67)	5403.25 (4855.54-5761.3)	668962.17 (460087.58-990188.79)	309796.71 (210372.36-468325.77)	359165.45 (247425.06-526757.95)
Caribbean	24075.25 (15127.53-33911.63)	11605.09 (7271.88-16506.04)	12470.17 (7851.4-17336.62)	1011.56 (840.32-1220.86)	389.96 (302.8-503.89)	621.6 (511.94-754.3)	104674.54 (75798.5-143104.81)	47099.2 (32561.26-65837.79)	57575.34 (42551.91-75578.94)
North Africa and Middle East	298247.03 (202461.21-422106.32)	133583.17 (90907.57-189409.61)	164663.86 (111395.75-232051.93)	7373.82 (5915.19-8547.17)	2991.74 (1962.15-3590.19)	4382.08 (3559.7-5288.65)	982282.25 (700420.21-1361899.16)	422901.85 (299093.83-598928.84)	559380.4 (402364.95-763597.92)
Central Europe	40009.64 (26683.69-53769.27)	18387.96 (12312.13-24735.02)	21621.68 (14702.61-29133.34)	2861.72 (2345.92-3209.82)	973.59 (759.17-1129.31)	1888.13 (1569.47-2112.33)	216269.66 (159252.5-295129.93)	84329.15 (58277.58-121567.03)	131940.51 (100577.15-173831.24)
Oceania	4420.43 (1714.02-7277.26)	1983.61 (784.43-3235.82)	2436.82 (940.66-4052.22)	229.37 (165.24-328.6)	59 (28.71-92.56)	170.36 (122.15-247.46)	26576.63 (16443.67-39292.32)	8963.79 (5048.84-14022.2)	17612.84 (11464.76-25391.09)
Southeast Asia	248332 (170940.21-336053.27)	124215.46 (85643.65-167679.86)	124116.54 (85282.22-166862.26)	3646.71 (2596.68-4321.68)	888.18 (611.06-1119.53)	2758.53 (1788.63-3331.8)	755399.08 (512524.59-1060685.29)	324947.34 (204419.11-478531.82)	430451.74 (299331.27-588313.75)
Eastern Europe	59542.98 (39814.79-81362.44)	28074.46 (18806.39-38373.71)	31468.52 (21113.44-43085.74)	1570.41 (1384.65-1742.86)	662.16 (568.62-760.56)	908.25 (781.48-1025.29)	185110.65 (125736.05-264283.64)	82650.83 (53825.15-122272.86)	102459.82 (71339.02-142699.05)
Central Asia	45658.96 (26279.14-63771.66)	20420.98 (11653.93-28914.01)	25237.97 (14665.82-35093.29)	2502.84 (2202.89-2819.96)	945.64 (765.48-1125.49)	1557.2 (1373.51-1761.44)	270936.63 (207394.2-353473.86)	113648.52 (83564.51-152108.97)	157288.11 (121332.09-205194.58)
High-income Asia Pacific	71299.06 (44655.59-98719.58)	34064.94 (21492.88-47427.94)	37234.13 (23117.35-51090.68)	2302.63 (2011.34-2516.92)	985.04 (775.03-1135.1)	1317.59 (1195.66-1389.72)	181526.38 (116478.4-288639.85)	82166.98 (50640.59-133623.72)	99359.39 (66116.49-155814.86)
Australasia	13634.2 (5442.31-21148.86)	6416.48 (2541.53-9936.61)	7217.72 (2852.81-11161.1)	360.67 (334.15-386.5)	154.61 (139.75-168.4)	206.06 (192.44-221.64)	35306.67 (19318.89-62512.21)	16006.9 (8395.84-29558.69)	19299.78 (11011.52-33296.77)
Andean Latin America	47503.11 (25464.12-68779.91)	25320.59 (13698.73-36957.35)	22182.52 (11832.44-32040.33)	912.13 (754.77-1092.94)	374.02 (275.67-469.17)	538.11 (441.73-651.75)	154768.96 (96445.16-230916.49)	73899.62 (43473.89-111193.23)	80869.34 (50963.12-119933.94)
Southern Latin America	32871.23 (15908.75-49490.64)	15444.06 (7356.09-23340.52)	17427.16 (8428.89-26514.83)	761.31 (713.84-811.17)	329.34 (305.32-352.68)	431.98 (404.37-462.84)	93164.79 (55654.06-147778.9)	43052.6 (25191.25-71127.94)	50112.19 (30697.76-77275.39)
Tropical Latin America	121092.55 (81539.28-161143.31)	55426.19 (37345.78-74430.51)	65666.37 (44361.16-86755.98)	3795.27 (3622.29-3937.21)	1398.42 (1299.73-1478.71)	2396.85 (2283.88-2488.85)	422868.29 (301543.99-584923.88)	179980 (123124.84-254826.87)	242888.29 (178354.56-332093.76)
Global	3272733.66 (2403802.43-4125118.75)	1536118.66 (1128506.54-1948581.73)	1736615 (1279499.93-2176393.94)	139850.93 (116952.55-153369.62)	55979.69 (39448.75-63073.83)	83871.23 (69902.62-94434.84)	13877827.48 (10732568.67-17619992.92)	5986291.61 (4439424.36-7794992.62)	7891535.88 (6182334.18-9856271.76)
Eastern Sub-Saharan Africa	258133 (167482.7-358826.42)	120819.67 (76770.39-169617.49)	137313.33 (90628.21-191359.46)	20643.33 (17587.12-24913.5)	6881.13 (5204.15-9297.57)	13762.2 (11473.46-17166.79)	1697816.75 (1361672.96-2111471.99)	666568.2 (500959.89-860252.85)	1031248.54 (837099.17-1292864.49)
Western Sub-Saharan Africa	323994.41 (220101.26-431751.75)	146871.93 (97962.51-195831.37)	177122.48 (121736.49-235348.32)	11949.78 (7787.82-14810.07)	2862.62 (1610.05-3707.66)	9087.16 (5657.68-11342.53)	1327545.49 (945494.98-1756096.01)	493132.88 (334108.45-678887.92)	834412.62 (594614.43-1079499.55)
High-income North America	143833.84 (90670.21-199907.84)	70768.8 (44791.01-97927.51)	73065.04 (46100.65-101980.33)	3822.1 (3581.55-3979.19)	1850.89 (1687.31-1955.5)	1971.21 (1886.87-2031.46)	423103.93 (271625.01-643342.72)	202952.23 (128759.34-311983.07)	220151.7 (142655.29-331366.95)
Central Sub-Saharan Africa	85154.93 (34157.98-138874.12)	36959.05 (14753.51-60893.35)	48195.89 (19179.18-78278.07)	4152.6 (3085.68-5730.9)	1045.84 (488.71-1657.6)	3106.76 (2222.52-4320.83)	441289.48 (287627.02-628281.37)	152597.04 (82502.06-237722.26)	288692.44 (195611.12-401505.75)
Southern Sub-Saharan Africa	46002.18 (29385.54-63985.67)	21069.54 (13436.66-29342.27)	24932.64 (16016.12-34605.24)	1920.18 (1667.9-2371.17)	611.38 (454.38-833.66)	1308.79 (1105.94-1683.55)	206133.91 (155805.59-263097.11)	82529 (57259.56-111220.21)	123604.91 (94620.45-159643.13)
East Asia	372849.14 (259684.14-491425.13)	177392.61 (123911.25-234786.1)	195456.53 (135269.96-257308.94)	12444.06 (10329.75-15388.32)	4443.33 (3325.98-6190.17)	8000.73 (6185.76-10387.41)	1435032.49 (1023184.72-1955287.57)	591988.58 (400891.8-837640.8)	843043.91 (607125.01-1134688.48)
South Asia	602049.79 (428444.26-784538.1)	278922.12 (201332.96-362848.93)	323127.67 (228046.45-420866.98)	41859.42 (31307.61-47630.98)	20545.03 (11578.16-24412.29)	21314.4 (16400.25-25015.21)	3612472.14 (2845809.89-4472973.76)	1699799.34 (1230806.45-2171999.72)	1912672.8 (1524829.97-2381756.65)
Central Latin America	173731.44 (121135.08-229075.2)	87485.41 (60998.96-115984.2)	86246.03 (59320.13-114172.16)	4825.62 (4221.18-5498.83)	2085.63 (1707.81-2469.59)	2739.99 (2422.96-3086.61)	636586.58 (455770.37-857864.99)	307280.84 (213868.97-419312.21)	329305.75 (241962.71-438979.87)
