# Supplementary material for: Global, Regional, and National Burden of Idiopathic Epilepsy: Temporal Trends and Drivers from 1990 to 2021
Source: Research Square preprint supplement (doi:10.21203/rs.3.rs-7019365/v1), 2025-08-08
Supplement: Supplementary file 3 [file 2509feb1cf6140bf74db27b0.xlsx]

## Sheet: 21regions_Deaths_decomposition_
location	Population_Growth	Age_Structure	Rate_Change
Western Europe	14.07	21.63	80.37
East Asia	22.16	1.58	-64.84
Southeast Asia	51.41	37.46	-53.43
Australasia	53.28	16.75	-36.05
Western Sub-Saharan Africa	155.06	-3.51	10.51
South Asia	70.93	18.69	-58.02
Oceania	113.26	11.39	28.71
Southern Latin America	37.93	15.91	-15.31
High-income North America	32.19	16.29	42.01
Central Asia	39.17	4.28	17.21
Caribbean	35.53	20.13	-30.26
North Africa and Middle East	85.76	6.7	-82.56
High-income Asia Pacific	7.49	11.54	94.11
Central Europe	-7.41	11.8	35.97
Central Sub-Saharan Africa	151.36	4.68	-31.05
Eastern Sub-Saharan Africa	125.42	2.69	-38.96
Central Latin America	55.94	23.14	-38.12
Eastern Europe	-8.21	4.98	-31.96
Andean Latin America	75.8	19.08	-87.75
Southern Sub-Saharan Africa	54.61	20.68	-8.67
Tropical Latin America	50.16	29.83	38.65
