# Supplementary material for: Global, Regional, and National Burden of Idiopathic Epilepsy: Temporal Trends and Drivers from 1990 to 2021
Source: Research Square preprint supplement (doi:10.21203/rs.3.rs-7019365/v1), 2025-08-08
Supplement: Supplementary file 4 [file 371acfe98153adec0833bb2f.xlsx]

## Sheet: ASRs_EAPC_21regions
location	ASIR/100,000 (95% UI)	ASIR_EAPC	Deaths/100,000 (95% UI)	ASMR_EAPC	DALYs/100,000 (95% UI)	ASDR_EAPC
Andean Latin America	71.71 (38.67-103.62)	-0.31 (-0.42 to -0.21)	1.4 (1.16-1.68)	-2.35 (-2.6 to -2.1)	232.53 (144.45-347.51)	-1.82 (-1.97 to -1.67)
Australasia	48.85 (19.76-75.95)	-0.08 (-0.11 to -0.06)	0.93 (0.88-1)	-1.02 (-1.27 to -0.77)	111.57 (60.77-199.67)	-0.84 (-0.93 to -0.76)
Caribbean	52.51 (32.89-73.75)	0.01 (-0.02 to 0.05)	2.04 (1.69-2.46)	-0.76 (-0.94 to -0.58)	220.7 (159.64-303.92)	-0.5 (-0.62 to -0.38)
Central Asia	47.45 (27.54-66.25)	0.15 (0.09 to 0.22)	2.59 (2.29-2.92)	-0.46 (-0.85 to -0.06)	280.7 (214.16-367.36)	-0.5 (-0.77 to -0.23)
Central Europe	41.92 (27.96-58.95)	0.17 (0.12 to 0.21)	1.82 (1.49-2.04)	0.34 (0.22 to 0.47)	174.56 (127.55-239.83)	-0.45 (-0.52 to -0.38)
Central Latin America	69.69 (48.39-92.19)	-0.18 (-0.22 to -0.14)	1.89 (1.65-2.16)	-0.76 (-0.95 to -0.58)	250.72 (179.25-337.21)	-0.98 (-1.09 to -0.86)
Central Sub-Saharan Africa	55.6 (22.4-88.94)	0.14 (0.05 to 0.24)	3.91 (2.88-5.41)	-0.29 (-0.36 to -0.23)	334.52 (220.92-477.24)	-0.26 (-0.34 to -0.17)
East Asia	28.18 (19.18-37.38)	0.11 (-0.09 to 0.32)	0.82 (0.69-1.01)	-2.87 (-2.99 to -2.74)	102.03 (74.13-138.71)	-2.32 (-2.46 to -2.18)
Eastern Europe	33.15 (22.04-45.28)	-0.48 (-0.52 to -0.44)	0.63 (0.55-0.7)	-3.21 (-3.83 to -2.59)	87.13 (58.08-124.66)	-2.21 (-2.45 to -1.97)
Eastern Sub-Saharan Africa	54.02 (35.99-73.18)	0.03 (-0.01 to 0.08)	7.49 (6.44-8.92)	-0.76 (-0.79 to -0.73)	423.53 (345.14-519.66)	-0.57 (-0.6 to -0.54)
Global	42.82 (31.24-53.72)	0.26 (0.23 to 0.3)	1.74 (1.46-1.92)	-0.56 (-0.61 to -0.5)	177.84 (137.66-225.9)	-0.6 (-0.64 to -0.56)
High-income Asia Pacific	45.04 (27.44-62.64)	0.09 (-0.02 to 0.2)	0.71 (0.66-0.75)	-0.01 (-0.38 to 0.36)	92.92 (59.13-144.3)	-0.66 (-0.76 to -0.56)
High-income North America	42.17 (26.95-59.59)	0.43 (0.2 to 0.65)	0.79 (0.75-0.81)	1.18 (0.72 to 1.64)	109.43 (69.25-167.98)	0.38 (0.21 to 0.54)
North Africa and Middle East	47.37 (32.28-66.75)	0.35 (0.3 to 0.4)	1.32 (1.08-1.52)	-1.62 (-1.65 to -1.58)	158.62 (113.88-219.76)	-1.16 (-1.2 to -1.11)
Oceania	29.71 (11.89-48.4)	-0.09 (-0.1 to -0.07)	1.73 (1.25-2.48)	0.42 (0.38 to 0.47)	187.92 (116-276.37)	0.11 (0.08 to 0.14)
South Asia	33.1 (23.43-42.49)	0.19 (0.07 to 0.32)	2.58 (1.87-2.94)	-1.03 (-1.14 to -0.91)	199.21 (156.41-246.16)	-0.97 (-1.06 to -0.88)
Southeast Asia	37.14 (25.44-50.84)	0.47 (0.44 to 0.5)	0.56 (0.4-0.66)	-1.01 (-1.08 to -0.93)	110.49 (75.07-155.65)	-0.19 (-0.24 to -0.14)
Southern Latin America	51.77 (25.01-78.4)	0.3 (0.27 to 0.33)	1.01 (0.95-1.08)	0.18 (0 to 0.35)	136.67 (80.72-216.41)	-0.27 (-0.35 to -0.2)
Southern Sub-Saharan Africa	56.65 (36.76-78.63)	-0.17 (-0.32 to -0.03)	2.54 (2.21-3.1)	0.04 (-0.15 to 0.24)	257.17 (195.2-330.47)	-0.31 (-0.46 to -0.15)
Tropical Latin America	55.23 (37.05-73.69)	-0.18 (-0.4 to 0.04)	1.55 (1.47-1.61)	0.72 (0.53 to 0.91)	183.07 (130.22-255.98)	-0.54 (-0.78 to -0.29)
Western Europe	65.28 (41.25-89.06)	0.3 (0.25 to 0.35)	1.41 (1.26-1.52)	0.97 (0.79 to 1.16)	135 (91.09-203.98)	0.02 (-0.07 to 0.12)
Western Sub-Saharan Africa	59.26 (42.17-77.35)	0.21 (0.1 to 0.33)	3.64 (2.42-4.46)	0.33 (0.22 to 0.43)	299.71 (215.99-386.81)	0.11 (0.02 to 0.2)
