# Supplementary material for: Global, Regional, and National Burden of Idiopathic Epilepsy: Temporal Trends and Drivers from 1990 to 2021
Source: Research Square preprint supplement (doi:10.21203/rs.3.rs-7019365/v1), 2025-08-08
Supplement: Supplementary file 5 [file 931d86fe129a416e17f83e79.xlsx]

## Sheet: country204_final
location	Incidence_Number (95% UI)	ASIR/100,000 (95% UI)	ASIR_EAPC (95% CI)	Deaths_Number (95% UI)	ASMR/100,000 (95% UI)	ASMR_EAPC (95% CI)	DALYs_Number (95% UI)	ASDR/100,000 (95% UI)	ASDR_EAPC (95% CI)
Afghanistan	16320.11 (3944.82-31363.19)	43.92 (10.19-83.9)	-0.19 (-0.3 to -0.07)	877.18 (640.88-1128.44)	3.33 (2.53-4.32)	-1.09 (-1.21 to -0.97)	98312.55 (61375.7-152313.54)	293.13 (182.27-448.94)	-1.08 (-1.18 to -0.99)
Albania	990.76 (255.2-1594.79)	43.56 (11.08-70.69)	0.38 (0.25 to 0.5)	59.82 (43.36-93.92)	1.99 (1.49-2.9)	-1.33 (-1.44 to -1.21)	5559.8 (3171.41-9431.22)	215.23 (123.54-367.27)	-1.26 (-1.37 to -1.14)
Algeria	19583.86 (5213.87-33093.34)	43.91 (11.81-74.65)	-0.14 (-0.17 to -0.11)	465.76 (377.32-583.21)	1.15 (0.93-1.49)	-1.59 (-1.63 to -1.56)	61469.17 (32145.95-101649.31)	139.89 (72.95-230.28)	-1.54 (-1.56 to -1.52)
American Samoa	19.68 (5.14-31.87)	40.29 (10.5-65.54)	0.29 (0.18 to 0.39)	0.64 (0.46-0.82)	1.37 (0.98-1.75)	2.13 (1.33 to 2.94)	94.57 (50.24-152.84)	195.78 (104.35-317.13)	0.85 (0.45 to 1.24)
Andorra	43.39 (12.28-65.44)	59.63 (17.2-92.15)	-0.16 (-0.2 to -0.13)	0.8 (0.54-1.08)	0.67 (0.45-0.9)	-1.11 (-1.25 to -0.97)	91.86 (41.99-180.5)	103.63 (46.06-201.81)	-0.79 (-0.86 to -0.73)
Angola	25614.58 (6738.24-45346.43)	69.29 (18.67-119.89)	0.48 (0.43 to 0.53)	952.25 (670.19-1292.97)	3.86 (2.78-5.15)	-0.76 (-0.85 to -0.68)	121740.49 (64097.48-195038.47)	388.57 (208.16-604.77)	-0.29 (-0.37 to -0.21)
Antigua and Barbuda	66.68 (18.02-106.42)	79.14 (21.12-126.7)	-0.04 (-0.07 to 0)	3.18 (2.93-3.42)	3.23 (2.98-3.46)	-1.35 (-1.64 to -1.05)	299.71 (173.1-480.52)	322.82 (184.9-523.18)	-1.1 (-1.25 to -0.95)
Argentina	19539.85 (4859.28-32977.27)	45.61 (11.37-77.22)	0.38 (0.3 to 0.46)	371.8 (344.87-401.33)	0.76 (0.71-0.82)	0.32 (0.11 to 0.53)	51393.87 (23949.2-93015.8)	113.5 (53.03-205.39)	-0.05 (-0.14 to 0.04)
Armenia	994.71 (331.39-1643.78)	38.04 (12.34-63.95)	-0.03 (-0.12 to 0.05)	28.19 (21.9-34.1)	0.83 (0.65-1)	-1.58 (-1.99 to -1.16)	3557.54 (1720.37-6136.48)	120.45 (57.68-211.43)	-1.27 (-1.42 to -1.12)
Australia	11256.85 (3191.06-18356.75)	48.29 (13.66-79.74)	-0.01 (-0.04 to 0.03)	298.45 (275.11-320.43)	0.91 (0.85-0.97)	-0.89 (-1.17 to -0.6)	29095.26 (14923.97-56000.19)	109.44 (55.74-209.22)	-0.72 (-0.81 to -0.62)
Austria	4491.63 (1349.14-7043.76)	57.44 (16.68-90.39)	-0.03 (-0.07 to 0)	157.55 (141.71-172.09)	1.05 (0.95-1.15)	0.87 (0.71 to 1.03)	10935.8 (5535.13-19587.27)	112.01 (53.4-207.67)	-0.18 (-0.23 to -0.12)
Azerbaijan	4593.54 (1369.18-7562.59)	47.08 (14.04-76.77)	0.43 (0.32 to 0.55)	261.19 (186.81-376.38)	2.35 (1.72-3.34)	-1.28 (-1.55 to -1.01)	27587.56 (15666.68-43858.2)	263.82 (149.99-417.93)	-0.83 (-0.96 to -0.7)
Bahamas	242.35 (77.19-392.64)	65.45 (20.58-105)	-0.17 (-0.21 to -0.12)	6.27 (4.9-7.95)	1.5 (1.18-1.9)	-1.42 (-1.66 to -1.17)	876.42 (415.07-1457.73)	219.12 (101.52-367.3)	-1.1 (-1.19 to -1)
Bahrain	810.33 (241.49-1347.06)	59.06 (17.24-97.78)	-0.03 (-0.09 to 0.03)	20.28 (16.48-26.82)	1.62 (1.33-1.97)	-2.14 (-2.3 to -1.97)	2586.63 (1379.79-4428.57)	178.6 (92.21-310.85)	-1.66 (-1.74 to -1.58)
Bangladesh	41792.63 (11936.01-73952.69)	25.74 (7.38-45.46)	-0.05 (-0.13 to 0.03)	1544.08 (1137.07-2102.22)	1.05 (0.76-1.41)	-2.18 (-2.36 to -2)	176491.8 (93809.22-303266.45)	108.03 (57.89-183.97)	-1.78 (-1.94 to -1.62)
Barbados	167.35 (52.05-265.1)	63.11 (19.15-102.46)	-0.35 (-0.43 to -0.26)	6.47 (5.04-8.03)	1.66 (1.29-2.08)	-1.73 (-1.95 to -1.52)	624.39 (333.65-1061.66)	199.75 (105-335.74)	-1.44 (-1.56 to -1.32)
Belarus	2510.4 (679.4-4138.4)	31.12 (8.59-51.55)	-0.54 (-0.68 to -0.41)	103.12 (84.06-124.05)	0.89 (0.72-1.07)	-3.22 (-3.6 to -2.83)	9620.95 (5216.04-16858.4)	99 (52.23-175.61)	-2.55 (-2.82 to -2.29)
Belgium	7213.44 (2103.67-11073.62)	66.68 (19.54-102.19)	0.28 (0.2 to 0.36)	364.54 (321.18-401.69)	1.93 (1.72-2.1)	1.48 (1.16 to 1.8)	21536.99 (12266.31-37721.07)	164.6 (90.45-293.71)	0.35 (0.2 to 0.51)
Belize	248.41 (69.94-437.54)	55.81 (15.69-97.33)	0.16 (0.05 to 0.27)	7.14 (6.09-8.32)	1.78 (1.53-2.06)	-0.97 (-1.33 to -0.62)	916.3 (467.8-1526.03)	209.96 (107.46-348.72)	-0.75 (-0.94 to -0.55)
Benin	8419.63 (1943.54-15562.02)	54.98 (13.04-100.62)	0.01 (-0.06 to 0.09)	354.28 (226.19-479.59)	4 (2.58-5.45)	0.24 (0.16 to 0.33)	38575.98 (20893.52-63322.36)	316.65 (180.3-492.25)	-0.11 (-0.17 to -0.04)
Bermuda	34.03 (10.36-54.94)	62.61 (19.56-102.58)	-0.28 (-0.33 to -0.22)	0.87 (0.72-1.08)	0.91 (0.75-1.14)	-2.46 (-2.9 to -2.02)	96.04 (42.41-187.1)	144.48 (60.86-281.58)	-1.58 (-1.76 to -1.39)
Bhutan	230.64 (63.65-419.48)	31.79 (8.54-57.82)	0.3 (0.26 to 0.34)	18.85 (12.67-27.24)	2.72 (1.84-3.92)	-1.04 (-1.19 to -0.89)	1659.91 (953.06-2603.99)	222.46 (126.97-348.03)	-0.78 (-0.95 to -0.61)
Bolivia (Plurinational State of)	5800.16 (1483.4-9714.9)	48.64 (12.47-82)	-0.1 (-0.41 to 0.21)	227.04 (160.42-312.05)	2.02 (1.43-2.78)	-1.87 (-1.91 to -1.83)	28633.34 (15075.47-46287.24)	242.84 (126.14-392.95)	-1.69 (-1.81 to -1.58)
Bosnia and Herzegovina	1111.06 (299.8-1799.03)	41 (11.19-69.11)	0.46 (0.34 to 0.58)	77.71 (49.18-103.83)	1.79 (1.19-2.35)	-0.81 (-1.01 to -0.6)	6084.7 (3338.77-9947.63)	176.67 (97.11-293.26)	-0.76 (-0.9 to -0.61)
Botswana	1525.54 (433.26-2597.64)	63.38 (18.18-106.35)	0.68 (0.55 to 0.8)	65.34 (47.4-83.78)	2.9 (2.15-3.68)	-0.65 (-0.75 to -0.55)	7653.8 (4330.18-11471.2)	318.29 (176.73-482.46)	-0.12 (-0.21 to -0.03)
Brazil	117284.67 (78931.3-156517.1)	55.3 (37.31-74.23)	-0.19 (-0.42 to 0.03)	3692.87 (3525.99-3826.22)	1.55 (1.48-1.61)	0.73 (0.53 to 0.93)	409014.97 (290944.72-565775.5)	182.63 (129.94-254.64)	-0.55 (-0.8 to -0.3)
Brunei Darussalam	243.05 (75.39-385.72)	56.42 (17.47-88.9)	-0.34 (-0.44 to -0.24)	5 (4.24-5.92)	1.18 (1.01-1.4)	-0.55 (-0.77 to -0.34)	779.94 (386.5-1314.44)	174.63 (85.52-292.42)	-0.93 (-1.11 to -0.74)
Bulgaria	2346.41 (643.38-3761.6)	43.52 (11.97-71.12)	0.2 (0.13 to 0.27)	179.7 (134.73-227.61)	2.04 (1.53-2.58)	0.72 (0.52 to 0.92)	14511.89 (8075.05-23744.53)	209.02 (115.42-339.47)	-0.02 (-0.13 to 0.08)
Burkina Faso	13357.55 (2353.95-26262.05)	50.83 (9.17-99.01)	0.19 (0.11 to 0.28)	633.26 (393.25-888.57)	4.36 (2.73-6.1)	0.34 (0.23 to 0.45)	63811.58 (32778.7-101253.83)	315.94 (165.2-491.79)	0.19 (0.14 to 0.23)
Burundi	7238 (1429.26-14567.3)	47.65 (9.19-93.68)	-0.97 (-1.12 to -0.81)	642.15 (477.58-843.15)	8.47 (6.36-11.38)	-0.19 (-0.24 to -0.15)	50753.48 (32858.66-73842.09)	427.11 (289.79-607.76)	-0.9 (-1.02 to -0.78)
Cabo Verde	369.05 (99.94-636.99)	66.93 (17.99-115.61)	0.81 (0.69 to 0.93)	17.59 (13.17-23.13)	3.27 (2.46-4.24)	-1.21 (-1.28 to -1.14)	1618.77 (870.83-2641.19)	287.73 (153.5-471.69)	-0.63 (-0.71 to -0.56)
Cambodia	5545.22 (1706.77-10145.42)	32.1 (9.96-58.66)	0.41 (0.34 to 0.49)	98.85 (61.39-189.56)	0.66 (0.41-1.24)	-1.03 (-1.09 to -0.97)	19342.97 (8402.2-33204.05)	114.45 (50-195.85)	-0.4 (-0.45 to -0.35)
Cameroon	20247.89 (5266.62-36088.22)	57.81 (14.88-102.28)	0.09 (0 to 0.18)	855.01 (510.38-1198.49)	3.92 (2.34-5.48)	0.22 (0.1 to 0.34)	90245.15 (49112.41-138832.27)	313.91 (176.26-472.1)	0.01 (-0.05 to 0.08)
Canada	12188.35 (3301.83-19376.77)	35.3 (8.98-57.46)	0.13 (-0.08 to 0.35)	394.91 (362.77-422.74)	0.78 (0.73-0.84)	-0.43 (-0.67 to -0.19)	36611.43 (18410.56-67324.73)	93.12 (46.6-173.72)	0.01 (-0.17 to 0.2)
Central African Republic	2957.7 (609.16-5532.93)	47.86 (9.92-89.38)	-0.12 (-0.2 to -0.04)	248.89 (175.12-353.86)	5.58 (3.95-7.81)	0.21 (0.1 to 0.32)	22428.05 (14325.08-33082.48)	414.48 (267.57-602.21)	0.05 (-0.01 to 0.1)
Chad	10490.85 (1870.89-20867.94)	49.34 (8.66-97.32)	0.55 (0.49 to 0.61)	523.31 (342.48-727.78)	5.11 (3.36-7.01)	1.27 (1.08 to 1.47)	52599.94 (28778.99-83422.05)	350.85 (206.94-522.59)	0.95 (0.81 to 1.09)
Chile	11550.78 (3443.98-18452.25)	66.29 (19.89-107.18)	0.18 (0.11 to 0.24)	316.17 (293.66-338.67)	1.45 (1.35-1.56)	-0.25 (-0.43 to -0.06)	35349.21 (17967.14-63166.66)	183.6 (92.36-331.85)	-0.68 (-0.82 to -0.54)
China	359965.65 (248027.04-475660.79)	28.19 (19.03-37.89)	0.12 (-0.09 to 0.33)	11885.97 (9814.72-14766.89)	0.81 (0.68-1)	-2.96 (-3.09 to -2.83)	1374718.54 (969522.54-1888679.86)	101.39 (72.51-139.41)	-2.38 (-2.53 to -2.23)
Colombia	30190.03 (7623.95-51155.84)	64.36 (16.19-110.33)	-0.04 (-0.13 to 0.06)	739.43 (612.34-875.7)	1.42 (1.17-1.68)	-0.49 (-0.82 to -0.17)	102285.04 (49615.55-183088.39)	206.3 (98.74-371.21)	-0.9 (-1.07 to -0.73)
Comoros	439.21 (131.67-782.46)	57.13 (17.12-101.05)	-0.05 (-0.12 to 0.02)	42.26 (30.78-58.94)	7.21 (5.26-10.25)	-0.74 (-0.98 to -0.51)	3029.11 (1962.92-4321.92)	419.94 (273.3-596.31)	-0.82 (-1.06 to -0.58)
Congo	3801.27 (1062.87-6520.33)	67.56 (18.95-115.04)	0.07 (0.02 to 0.12)	163.35 (115.4-221.29)	3.55 (2.55-4.79)	-0.6 (-0.73 to -0.48)	18729.62 (10262.01-28721.01)	356.2 (194.61-544.19)	-0.59 (-0.69 to -0.49)
Cook Islands	6.88 (2.12-11.16)	40.97 (12.87-66.51)	0.2 (0.16 to 0.24)	0.11 (0.08-0.16)	0.64 (0.47-0.9)	-1.38 (-1.47 to -1.3)	23.89 (10.68-43.74)	136.04 (62.42-247.24)	-0.65 (-0.7 to -0.6)
Costa Rica	2859.55 (838.15-4631.16)	63.47 (18.77-104.72)	0.11 (0.05 to 0.16)	86.18 (76.16-96.58)	1.65 (1.46-1.85)	-0.24 (-0.5 to 0.02)	9906.32 (5297.59-16667.14)	203.74 (107.1-344.55)	-0.38 (-0.5 to -0.25)
Côte d'Ivoire	18420.69 (4397.78-33460.15)	60.69 (14.47-109.15)	0.07 (-0.04 to 0.17)	803.31 (484.92-1110.7)	4.08 (2.53-5.6)	0.57 (0.46 to 0.68)	85742.77 (46260.48-138934.97)	336.5 (187.56-530.08)	0.17 (0.1 to 0.24)
Croatia	1579.41 (443.93-2488.75)	45.32 (11.94-73.46)	-0.13 (-0.25 to -0.02)	98.04 (70.41-122.12)	1.62 (1.14-2.03)	0.23 (0.06 to 0.41)	7892.05 (3926.62-14287.52)	172.13 (83.76-318.51)	-0.72 (-0.89 to -0.55)
Cuba	4105.22 (1141.65-6895.74)	43.97 (12.24-75.35)	-0.08 (-0.16 to -0.01)	119.57 (102.64-138.37)	0.78 (0.68-0.9)	-1.54 (-1.93 to -1.14)	11668.46 (5782.8-20845.39)	103.56 (47.7-190.54)	-1.06 (-1.26 to -0.87)
Cyprus	616.18 (169.91-987.22)	51.14 (14.01-82.26)	-0.09 (-0.15 to -0.02)	12.09 (9.71-14.32)	0.7 (0.57-0.83)	-2.45 (-2.62 to -2.28)	1226.01 (586.8-2275.25)	87.56 (39.41-164.61)	-1.48 (-1.56 to -1.39)
Czechia	4163.39 (1255.16-6575.23)	46.13 (13.6-75.71)	0.1 (0.04 to 0.15)	257.27 (194.86-316.91)	1.68 (1.27-2.07)	0.31 (-0.05 to 0.68)	20233.7 (10841.54-35456.61)	175.05 (90.64-312.61)	-0.45 (-0.58 to -0.31)
Democratic People's Republic of Korea	5162.44 (1381.8-9074.9)	21.74 (5.9-38.69)	-0.47 (-0.5 to -0.44)	259.06 (177.4-416.81)	0.95 (0.66-1.53)	-0.92 (-0.96 to -0.88)	28174.37 (15412.14-46235.94)	110.01 (60.74-183)	-1.35 (-1.38 to -1.33)
Democratic Republic of the Congo	49843.22 (10596.98-92421.5)	49.34 (10.43-91.1)	-0.06 (-0.21 to 0.08)	2705.14 (1904.15-3949.02)	3.88 (2.69-5.71)	-0.12 (-0.21 to -0.04)	266322.36 (157816.59-418849.41)	307.58 (184.23-474.23)	-0.27 (-0.39 to -0.16)
Denmark	2266.52 (605.59-3530.83)	42.61 (11.12-66.87)	-0.17 (-0.25 to -0.1)	134.85 (119.11-150.68)	1.38 (1.24-1.54)	1.24 (0.92 to 1.56)	7278.73 (4319.42-12652.73)	106.98 (60.58-189.59)	-0.14 (-0.32 to 0.04)
Djibouti	799.69 (212.25-1429.32)	61.9 (16.47-110.27)	0.19 (0.17 to 0.22)	58.89 (41.03-83.22)	6.84 (4.98-9.51)	-0.24 (-0.48 to -0.01)	4899.88 (3085.27-7081.78)	415.46 (266.63-596.86)	-0.26 (-0.46 to -0.06)
Dominica	49.28 (17.46-77.79)	77.57 (27.16-123.42)	0.14 (0.06 to 0.21)	2.64 (2.06-3.37)	3.64 (2.83-4.68)	-0.53 (-0.62 to -0.44)	263.12 (152.9-408.44)	386.78 (225.04-604.36)	-0.25 (-0.3 to -0.2)
Dominican Republic	6378.82 (1815.37-10939.37)	57.98 (16.36-98.46)	0.74 (0.67 to 0.82)	154.66 (123.55-203.8)	1.41 (1.13-1.85)	-0.84 (-0.99 to -0.69)	22957.44 (11029.98-39725.88)	207.04 (99.51-358.27)	-0.04 (-0.18 to 0.1)
Ecuador	17237.04 (5412.36-29200.14)	94.94 (29.94-160.51)	-0.02 (-0.11 to 0.06)	391.38 (259.66-520.34)	2.22 (1.47-2.95)	-2.04 (-2.57 to -1.52)	57007.54 (28158.94-95303.18)	313.86 (155.03-524.75)	-1.34 (-1.51 to -1.18)
Egypt	52019.37 (13580.63-88281.95)	46.29 (12.04-77.72)	0.49 (0.37 to 0.61)	706.8 (494.89-884.46)	0.81 (0.6-0.99)	0.09 (-0.17 to 0.36)	141500.27 (63435.9-258098.98)	132.67 (59.72-240.36)	-0.33 (-0.54 to -0.13)
El Salvador	3575.37 (849.94-6057.91)	54.97 (13.24-92.64)	0.32 (0.26 to 0.37)	66.37 (48.62-83.47)	1.03 (0.75-1.3)	-1.13 (-1.31 to -0.94)	10803.58 (4826.77-19129.69)	165.89 (74.17-292.79)	-0.86 (-0.95 to -0.77)
Equatorial Guinea	1371.91 (341.7-2319.07)	84.91 (20.56-140.91)	1.9 (1.62 to 2.18)	35.16 (21.77-54.32)	2.92 (1.91-4.37)	-1.68 (-1.81 to -1.54)	5430.79 (2708.28-8956.52)	370.11 (185.03-625.76)	0.01 (-0.14 to 0.15)
Eritrea	4034.66 (989.26-7499.52)	55.75 (13.88-102.53)	0.12 (-0.04 to 0.27)	372.67 (266.26-509.3)	8.61 (6.41-11.43)	0.25 (0.22 to 0.29)	30121.12 (19628.93-43903.73)	486.42 (329.23-688.75)	-0.13 (-0.2 to -0.06)
Estonia	525.52 (163.72-808.45)	44.89 (13.72-69.46)	0.72 (0.53 to 0.91)	29.53 (24.39-34.81)	1.72 (1.39-2.05)	-3.75 (-4.36 to -3.13)	2531.84 (1368.35-4280.34)	177.53 (97.57-298.47)	-2.3 (-2.58 to -2.02)
Eswatini	689.39 (160.99-1220.92)	56.63 (13.58-98.47)	0.57 (0.39 to 0.76)	33.89 (22.33-46.39)	3.38 (2.32-4.61)	-0.02 (-0.29 to 0.24)	3765.37 (2243.19-5794.81)	329 (195.39-508.67)	0.27 (0 to 0.55)
Ethiopia	50041.57 (26329.22-75112.51)	41.38 (21.95-62.26)	-0.06 (-0.16 to 0.04)	5212.24 (4266.39-6244.8)	7.58 (6.2-9.17)	-1.71 (-1.82 to -1.61)	378228.21 (303893.63-478535.15)	372.56 (302.94-464.03)	-1.59 (-1.68 to -1.5)
Fiji	380.89 (111.23-615.88)	41.21 (12.06-66.5)	0.17 (0.13 to 0.21)	17.06 (12.42-23.39)	1.88 (1.38-2.57)	-0.26 (-0.34 to -0.17)	2219.84 (1217.2-3480.06)	239.76 (130.79-376.7)	-0.08 (-0.13 to -0.03)
Finland	2532.48 (764.78-3993.87)	52.4 (15.66-84.14)	0.23 (0.19 to 0.28)	125.73 (110.08-139.99)	1.35 (1.21-1.48)	0.88 (0.62 to 1.15)	7784.49 (4342.16-14023.39)	126.4 (67.91-229.23)	0.05 (-0.08 to 0.19)
France	47358.84 (16631.92-74012.77)	76.22 (26.33-120.95)	0.09 (-0.03 to 0.21)	2010.93 (1742.66-2243.24)	1.66 (1.5-1.82)	0.1 (-0.23 to 0.43)	116702.07 (65075.7-214830.61)	152.56 (83.62-292.79)	-0.35 (-0.52 to -0.18)
Gabon	1566.26 (334.41-2705.3)	82.8 (17.75-140.92)	0.22 (0.15 to 0.28)	47.81 (33.39-69.13)	3.07 (2.2-4.28)	-1.06 (-1.18 to -0.95)	6638.17 (3389.38-10843.91)	374.86 (194.31-615.75)	-0.73 (-0.84 to -0.62)
Gambia	1351.9 (302.4-2437.41)	51.01 (11.75-90.35)	0.21 (0.11 to 0.31)	75.94 (53.16-103.07)	4.54 (3.14-6.1)	0.58 (0.39 to 0.77)	6839.86 (4204.45-9853.24)	316.87 (201.2-452.58)	0.33 (0.18 to 0.49)
Georgia	1344.9 (409.42-2186.6)	41.54 (12.49-68.35)	0.04 (-0.16 to 0.24)	63.72 (49.75-76.16)	1.53 (1.22-1.82)	-0.3 (-0.69 to 0.08)	6456.46 (3460.66-10518.36)	177.83 (96.14-291.41)	-0.57 (-0.75 to -0.38)
Germany	74433.03 (22870.88-112811.32)	91.82 (27.51-140.48)	0.83 (0.67 to 0.99)	3147.07 (2764.56-3454.64)	1.86 (1.67-2.01)	1.91 (1.65 to 2.17)	185643.09 (98910.74-356086.08)	178.78 (88.79-355.02)	0.58 (0.41 to 0.76)
Ghana	20838.65 (5732.8-35586.69)	56.42 (15.15-95.64)	0.68 (0.59 to 0.78)	619.82 (415.55-816.81)	2.36 (1.62-3.07)	0.93 (0.62 to 1.24)	78350.52 (41633.4-127922.91)	239.21 (129.52-383.26)	0.67 (0.48 to 0.86)
Greece	4020.47 (1041.41-6327.61)	47.92 (12.44-76.12)	0.08 (0.02 to 0.13)	180.61 (164-195.9)	0.95 (0.87-1.02)	2.54 (2.41 to 2.67)	10647.79 (5776.04-19089.4)	95.4 (48.17-179.74)	0.57 (0.51 to 0.63)
Greenland	29.8 (9.88-47.49)	53.78 (17.92-86.17)	-0.01 (-0.07 to 0.06)	1.57 (0.98-2.04)	2.43 (1.6-3.1)	-1 (-1.57 to -0.41)	151.33 (80.88-259)	250.9 (135.42-429.72)	-0.97 (-1.27 to -0.68)
Grenada	62.08 (17.27-102.1)	63.05 (17.36-104.43)	0.17 (0.14 to 0.2)	2.4 (2.05-2.76)	2.17 (1.86-2.49)	-1.55 (-1.78 to -1.33)	253.99 (138.2-413.11)	240.06 (128.52-393.05)	-1.02 (-1.15 to -0.89)
Guam	61.37 (21.06-99.8)	39.89 (13.55-65.08)	0.2 (0.15 to 0.25)	0.56 (0.32-0.7)	0.36 (0.2-0.45)	2.48 (1.93 to 3.03)	200.62 (76.02-378.18)	125.46 (47.86-236.97)	0.43 (0.3 to 0.56)
Guatemala	10197.11 (2788.44-16910.3)	61.46 (17.01-101.68)	0.29 (0.26 to 0.32)	327.06 (277.19-383.82)	2.24 (1.9-2.62)	-1.44 (-1.66 to -1.21)	45501.06 (24812.61-73550.38)	284.48 (156.4-453.57)	-0.86 (-0.99 to -0.72)
Guinea	8029.75 (1686.54-16066.92)	52.68 (11.5-103.69)	0.17 (0.1 to 0.24)	400.69 (263.8-539.06)	4.52 (3.01-6.06)	0.75 (0.61 to 0.9)	40223.63 (22794.84-65629.34)	335.44 (201.52-527.54)	0.31 (0.23 to 0.39)
Guinea-Bissau	1242.97 (239.27-2340.83)	54.34 (10.43-100.74)	-0.19 (-0.3 to -0.08)	76.11 (52.99-101.77)	5.46 (3.8-7.16)	0.56 (0.43 to 0.69)	7168.53 (4197.41-11059.51)	392.53 (239.98-587.93)	0.08 (-0.01 to 0.17)
Guyana	493.75 (143.24-810.32)	63.79 (18.47-104.93)	0.3 (0.26 to 0.35)	26.31 (20.05-33.75)	3.57 (2.73-4.57)	-0.25 (-0.5 to 0)	2624.97 (1518.06-3892.32)	340.79 (197.18-506.67)	-0.11 (-0.24 to 0.01)
Haiti	6451.81 (1574.37-11690.15)	47.1 (11.61-85.2)	-0.24 (-0.3 to -0.18)	461.43 (337.86-633.44)	4.19 (3.11-5.76)	-0.92 (-1.01 to -0.84)	41456.01 (25670.61-61579)	323.52 (202.6-482.01)	-0.9 (-1 to -0.8)
Honduras	5930.35 (1308.49-10385.51)	56.6 (12.45-97.7)	-0.18 (-0.29 to -0.07)	262.97 (182.24-362.11)	2.96 (2.1-4.01)	-1.11 (-1.17 to -1.06)	29360.08 (16231.67-45499.69)	292.49 (164.02-456.71)	-1.17 (-1.26 to -1.09)
Hungary	3177.03 (1018.33-5092.05)	41.1 (12.76-68.02)	-0.18 (-0.22 to -0.13)	173.63 (139.08-212.49)	1.31 (1.04-1.61)	-0.78 (-1.04 to -0.52)	15019.79 (7857.81-26371.4)	148.48 (74.7-266.42)	-1.11 (-1.21 to -1.01)
Iceland	167.72 (46.83-259.88)	51.38 (14.66-80.29)	0.48 (0.45 to 0.51)	4.89 (4.35-5.4)	1.02 (0.92-1.12)	1.69 (1.49 to 1.89)	395.54 (206.08-754.9)	106.23 (53.83-205.12)	0.57 (0.5 to 0.64)
India	457419.98 (325185.6-602651.31)	33.17 (23.65-43.19)	0.18 (0.02 to 0.34)	31176.43 (22982.56-35982.81)	2.46 (1.78-2.84)	-1.15 (-1.28 to -1.02)	2646968.09 (2052364.15-3304932.72)	191.62 (146.95-237.72)	-1.13 (-1.24 to -1.02)
Indonesia	92528.23 (61422.96-124849.36)	34.9 (22.87-46.8)	0.38 (0.35 to 0.42)	904.56 (217.87-1422.02)	0.36 (0.09-0.55)	-0.22 (-0.29 to -0.15)	248915.94 (144392.07-364035.08)	92.68 (54.08-136.02)	-0.02 (-0.07 to 0.04)
Iran (Islamic Republic of)	39827.38 (27032.32-52554.36)	50.02 (33.83-65.75)	0.36 (0.23 to 0.5)	604.46 (543.19-769.12)	0.74 (0.67-0.95)	-2.24 (-2.37 to -2.11)	98687.21 (67058.73-139668.74)	121.49 (81.68-172.73)	-1.55 (-1.69 to -1.4)
Iraq	19238.04 (5800.24-32017.46)	44.17 (13.26-73.41)	0.44 (0.4 to 0.49)	314.13 (239.68-408.93)	0.87 (0.68-1.13)	-2.19 (-2.34 to -2.05)	52367.38 (25908.64-87928.19)	124.65 (62.63-208.69)	-1.3 (-1.38 to -1.21)
Ireland	2888 (887.44-4474.13)	63.77 (19.41-100.71)	0.17 (0.07 to 0.27)	84.57 (74.21-94.81)	1.28 (1.12-1.43)	0.53 (0.22 to 0.85)	6728.2 (3555.15-12478.51)	129.27 (66.76-242.31)	-0.22 (-0.43 to -0.01)
Israel	5001.15 (1653.59-7850.47)	52.93 (17.38-83.19)	0.28 (0.25 to 0.31)	125.1 (110.65-139.03)	1.11 (0.99-1.24)	1.37 (1.03 to 1.71)	11159.01 (5713.19-21196.71)	113.35 (57.47-216.41)	0.31 (0.18 to 0.44)
Italy	22896.55 (15348.01-31204.93)	43.05 (28.68-59.72)	-0.46 (-0.6 to -0.31)	1541.38 (1248.09-1737.83)	1.22 (0.98-1.38)	3.07 (2.77 to 3.38)	69513.91 (49195.19-100630.98)	97.07 (65.57-148.32)	0.17 (-0.01 to 0.34)
Jamaica	1568.73 (443.9-2585.18)	58.51 (17.02-95.44)	0.08 (0.03 to 0.12)	62.82 (46.48-82.48)	2.07 (1.53-2.72)	-0.17 (-0.54 to 0.21)	6089.9 (3191.55-9978.66)	211.87 (109.31-348.59)	-0.49 (-0.68 to -0.29)
Japan	47553.83 (31555.99-64782.26)	44.03 (28.26-61)	0.21 (0.06 to 0.36)	1704.57 (1451.63-1859.8)	0.66 (0.62-0.7)	1.67 (1.2 to 2.15)	120160.69 (79422.95-190673.34)	86.96 (56.74-135.84)	0.17 (0.05 to 0.29)
Jordan	5515.13 (1556.29-8938.87)	43.51 (12.34-70.03)	0.13 (0.08 to 0.18)	76.96 (62.61-97.11)	0.72 (0.58-0.9)	-2.83 (-3.04 to -2.63)	13622 (6588.82-24303.36)	109.22 (53.4-192.99)	-1.71 (-1.79 to -1.63)
Kazakhstan	9430.32 (2662.53-15433.14)	49.76 (14.14-82.01)	0.16 (0.08 to 0.23)	369.31 (321.65-425.53)	1.93 (1.69-2.21)	-0.56 (-1.17 to 0.06)	43810.45 (24201.61-73499.88)	230.32 (126.44-386.58)	-0.79 (-1.2 to -0.38)
Kenya	35641.77 (25413.14-47859.09)	66.17 (48.49-87.04)	0.09 (0.04 to 0.14)	2036.8 (1584.45-2527.32)	6.08 (4.68-7.49)	-0.15 (-0.21 to -0.08)	178110 (137308.87-220746.98)	377.86 (295.64-465.76)	0.05 (-0.01 to 0.12)
Kiribati	45.54 (11.21-81.93)	35.63 (8.84-63.89)	-0.18 (-0.21 to -0.15)	2.69 (1.94-3.67)	2.32 (1.71-3.09)	-0.39 (-0.44 to -0.34)	313.8 (187-473.68)	253.82 (151.02-385.66)	-0.5 (-0.54 to -0.45)
Kuwait	2205.71 (585.38-3562.87)	53.88 (14.68-86.57)	-0.31 (-0.46 to -0.16)	23.19 (18.64-28.41)	0.59 (0.48-0.72)	-2.79 (-3.21 to -2.37)	4884.35 (1967.28-9506.89)	117.94 (46.35-231.56)	-1.83 (-2.08 to -1.57)
Kyrgyzstan	3245.06 (879.08-5503.83)	44.99 (12.19-76.12)	-0.44 (-0.55 to -0.33)	203.84 (167.16-246.4)	3.06 (2.5-3.69)	-1 (-1.58 to -0.4)	19727.87 (12490.63-29755.64)	284.32 (179.23-428.91)	-1.25 (-1.66 to -0.85)
Lao People's Democratic Republic	2531.71 (641.31-4326.91)	33.36 (8.55-56.78)	0.39 (0.35 to 0.43)	40.25 (24.44-80.89)	0.63 (0.39-1.28)	-1.32 (-1.36 to -1.28)	9119.14 (3590.65-16393.27)	124.08 (48.47-221.69)	-0.44 (-0.49 to -0.39)
Latvia	651.57 (202.13-1035.32)	40.88 (12.41-65.24)	0.21 (0.08 to 0.34)	35.63 (27.11-44.51)	1.48 (1.12-1.86)	-3.01 (-3.66 to -2.35)	3247.84 (1753.93-5745.57)	161.8 (86.16-286.25)	-1.77 (-2.07 to -1.47)
Lebanon	2373.24 (737.09-4004.85)	45.62 (14.29-76.58)	0.28 (0.24 to 0.33)	100.74 (82.99-124.91)	1.67 (1.38-2.04)	-1.83 (-1.95 to -1.72)	8158.73 (4653.74-13261.84)	149.17 (83.75-244.14)	-1.59 (-1.66 to -1.52)
Lesotho	966.95 (208.42-1739.77)	49.05 (10.32-86.47)	0.96 (0.85 to 1.07)	51.44 (36.56-68.46)	3.15 (2.25-4.21)	1.31 (0.98 to 1.64)	5423.98 (3076.38-8094.03)	290.43 (165.67-427.57)	1.34 (1.09 to 1.58)
Liberia	3101.12 (644.79-5818.56)	52.04 (10.47-97.39)	0.02 (-0.06 to 0.1)	148.47 (90.91-214.88)	3.77 (2.33-5.48)	-0.43 (-0.56 to -0.3)	14728.74 (8272.9-22412.53)	290.48 (165.39-431.57)	-0.59 (-0.74 to -0.44)
Libya	2826.09 (810.28-4570.67)	43.55 (12.84-69.88)	0.08 (-0.06 to 0.21)	69.6 (45.59-100.04)	1.08 (0.72-1.53)	-1.25 (-1.34 to -1.16)	8771.43 (4553.11-14560.41)	131.67 (66.89-218.46)	-1.07 (-1.1 to -1.04)
Lithuania	1004.93 (324.93-1556.37)	42.82 (13.78-67.35)	0.21 (0.08 to 0.34)	67.16 (54.34-80.39)	1.92 (1.54-2.32)	-2.43 (-2.95 to -1.91)	5584.48 (3235.64-9039.22)	190.13 (110.8-303.03)	-1.52 (-1.76 to -1.28)
Luxembourg	421.44 (140.79-651.49)	70.16 (23.9-109.67)	0.24 (0.2 to 0.28)	15.39 (13.43-17.57)	1.62 (1.42-1.86)	0.45 (0.27 to 0.62)	1095.83 (584.77-1956.49)	153.46 (78.42-278.75)	-0.32 (-0.39 to -0.24)
Madagascar	16687.68 (4353.69-31234.24)	52.06 (13.37-96.65)	-0.26 (-0.3 to -0.21)	1089.96 (819.84-1470.03)	5.74 (4.41-7.67)	-0.66 (-0.7 to -0.63)	99907.23 (65834.84-144986.07)	363.12 (241.61-514.91)	-0.57 (-0.61 to -0.54)
Malawi	11650.96 (2717.61-21236.6)	52.14 (12.34-94.22)	-0.06 (-0.11 to -0.01)	1093.53 (795.5-1408.11)	8.5 (6.45-10.67)	-0.7 (-0.78 to -0.62)	86597.51 (58298.61-124396.38)	468.78 (329.76-652.79)	-0.5 (-0.6 to -0.4)
Malaysia	13612.19 (3530.92-22124.99)	44.64 (11.78-72.67)	0.35 (0.31 to 0.39)	215.89 (186.48-260.82)	0.74 (0.64-0.9)	-1.23 (-1.35 to -1.11)	43470.42 (17072.2-78361.59)	138.71 (54.19-247.76)	-0.49 (-0.53 to -0.46)
Maldives	202.09 (61.44-345.6)	43.62 (13.01-75.82)	0.13 (0.07 to 0.19)	4.47 (3.26-7.5)	0.98 (0.78-1.38)	-2.06 (-2.31 to -1.81)	756.47 (320.93-1373.96)	154.05 (66.97-275.24)	-1.28 (-1.43 to -1.12)
Mali	12226.04 (2788.38-23660.99)	43.61 (10.22-84.06)	0 (-0.27 to 0.27)	738.19 (487.88-1011.65)	4.98 (3.3-6.87)	0.58 (0.49 to 0.67)	64679.86 (37823.55-98313.22)	321.21 (194.44-462.6)	0.22 (0.12 to 0.33)
Malta	195.07 (57.46-313.82)	51.39 (15.21-84.18)	0.35 (0.29 to 0.41)	5.69 (4.96-6.43)	0.81 (0.71-0.91)	1.73 (1.52 to 1.95)	452.73 (227.28-852.4)	96.54 (46.95-187.81)	0.46 (0.38 to 0.54)
Marshall Islands	19.02 (4.82-34.9)	32.84 (8.29-60.18)	0.16 (0.09 to 0.23)	0.85 (0.64-1.15)	1.53 (1.16-2.04)	-0.1 (-0.25 to 0.05)	107.68 (57.03-166.89)	186.32 (97.15-290.2)	-0.09 (-0.24 to 0.05)
Mauritania	2681.48 (760.38-4600.3)	55.78 (15.69-95.13)	-0.07 (-0.24 to 0.09)	102.86 (71.99-134.8)	3.34 (2.32-4.34)	0.02 (-0.15 to 0.19)	10668.56 (5982.33-17028.55)	269.7 (159.29-421.71)	-0.41 (-0.57 to -0.24)
Mauritius	706.36 (238-1123.65)	61.41 (21.23-99.53)	0.66 (0.62 to 0.7)	51.96 (47.05-57)	3.47 (3.12-3.82)	0.71 (0.09 to 1.34)	4443.27 (2647.42-6997.74)	339.82 (202.68-542.73)	0.67 (0.44 to 0.91)
Mexico	97906.44 (66968.34-130109.66)	76.98 (52.84-101.64)	-0.31 (-0.36 to -0.26)	2589.7 (2171.21-3009.69)	2 (1.68-2.32)	-0.93 (-1.16 to -0.71)	347066.64 (248049.47-468839.52)	268.46 (191.96-360.85)	-1.16 (-1.28 to -1.03)
Micronesia (Federated States of)	35.84 (7.45-61.82)	34.14 (7.24-58.62)	-0.03 (-0.08 to 0.02)	1.44 (1.1-1.93)	1.46 (1.13-1.95)	-0.58 (-0.61 to -0.56)	192.5 (100.28-310.48)	184.78 (96.14-298.95)	-0.53 (-0.59 to -0.47)
Monaco	19.73 (6.46-31.46)	59.97 (18.88-96.06)	0.11 (0.08 to 0.15)	0.35 (0.23-0.45)	0.6 (0.39-0.81)	0.78 (0.48 to 1.07)	42.78 (17.15-88.17)	103.78 (42.18-209.89)	0.01 (-0.04 to 0.06)
Mongolia	1498.74 (319.42-2592.04)	43.21 (9.18-74.01)	0.35 (0.29 to 0.42)	58.6 (45.7-73.37)	1.8 (1.4-2.26)	-1.48 (-1.65 to -1.31)	7457.59 (3924.09-12135.41)	223.36 (116.41-364.36)	-0.95 (-1.08 to -0.81)
Montenegro	201.29 (55.57-326.58)	38.21 (10.43-62.64)	0.02 (-0.03 to 0.07)	5.35 (4.21-6.63)	0.73 (0.58-0.9)	-0.79 (-0.97 to -0.62)	710.16 (301.74-1357.17)	113.86 (46.14-221.33)	-0.75 (-0.86 to -0.65)
Morocco	15674.86 (3772.54-27015.52)	43.2 (10.45-74.37)	0.16 (0.12 to 0.21)	616.67 (447.63-779.2)	1.79 (1.31-2.23)	-1.48 (-1.51 to -1.46)	61406.13 (35318.38-99584.47)	168.53 (97.26-273.82)	-0.96 (-1.03 to -0.88)
Mozambique	20223.2 (3814.65-37369.94)	57 (11.06-104.57)	0.56 (0.35 to 0.77)	1436.67 (1059.79-2032.5)	7.9 (5.9-10.59)	-0.42 (-0.51 to -0.33)	129021.51 (76502.83-190701.29)	455.66 (293.1-651.54)	-0.02 (-0.15 to 0.11)
Myanmar	21074.18 (5878.56-37540.49)	37.54 (10.46-66.73)	0.5 (0.44 to 0.55)	519.69 (301.46-712.43)	0.95 (0.58-1.29)	-1.52 (-1.63 to -1.41)	85397.24 (37180.44-147646.12)	150.72 (65.47-260.47)	-0.44 (-0.47 to -0.4)
Namibia	1346.52 (402.59-2376.54)	53.4 (15.71-92.16)	0.32 (0.24 to 0.4)	60.42 (43.4-84.99)	2.86 (2.07-3.95)	-0.35 (-0.46 to -0.24)	6555.27 (3786.96-10215.4)	274.72 (159.1-429.88)	-0.19 (-0.3 to -0.09)
Nauru	4.71 (1.24-7.87)	39.41 (10.37-65.46)	-0.23 (-0.35 to -0.11)	0.16 (0.12-0.21)	1.67 (1.28-2.18)	0.08 (-0.16 to 0.33)	24.16 (12.41-38.81)	217.34 (111.13-348.72)	-0.51 (-0.55 to -0.47)
Nepal	11065.98 (2420.65-19669.17)	35.76 (7.78-63.58)	0.55 (0.43 to 0.67)	1253.43 (838.88-1676.28)	5.49 (3.07-7.55)	-0.66 (-0.76 to -0.55)	84578.47 (52278.62-128683.05)	290.54 (185.35-435.2)	-0.73 (-0.83 to -0.63)
Netherlands	8766.09 (2584.97-13715.71)	56.43 (16.12-91.45)	0.7 (0.56 to 0.84)	373.16 (330.02-411.81)	1.36 (1.23-1.48)	1.23 (1.01 to 1.44)	23868.82 (13540.31-43364.66)	126.59 (70.07-231.45)	0.36 (0.23 to 0.5)
New Zealand	2377.34 (936.01-3586.52)	51.48 (20.61-77.87)	-0.4 (-0.45 to -0.35)	62.22 (57.47-67.56)	1.05 (0.97-1.14)	-1.57 (-1.82 to -1.32)	6211.41 (3582.52-10253.04)	121.52 (70.55-199.03)	-1.35 (-1.47 to -1.24)
Nicaragua	3500.27 (840.62-6539.94)	51.34 (12.59-95.55)	-0.09 (-0.12 to -0.06)	79.9 (66.9-98.79)	1.3 (1.08-1.59)	-1.37 (-1.48 to -1.25)	11402.87 (5741.5-20316.55)	170.48 (85.55-302.19)	-1.31 (-1.36 to -1.26)
Niger	12533.38 (2162.29-26971.95)	41 (7.11-85.1)	-0.29 (-0.34 to -0.25)	683.33 (389.57-1083.58)	4.82 (2.79-7.6)	0.35 (0.27 to 0.44)	63409.97 (33606.21-101664.7)	305.76 (174.63-484.48)	-0.07 (-0.14 to 0)
Nigeria	170702.44 (118785.74-224352.06)	66.36 (47.6-86.14)	0.3 (0.13 to 0.48)	4877.73 (2880.42-6788.4)	3.16 (1.91-4.32)	0.02 (-0.11 to 0.15)	608585.11 (436414.28-811012.02)	288.51 (205.53-374.53)	0.01 (-0.12 to 0.15)
Niue	0.63 (0.19-1.04)	39.77 (11.85-64.75)	0.22 (0.17 to 0.27)	0.02 (0.02-0.03)	1.39 (1.15-1.75)	-0.4 (-0.68 to -0.12)	3.16 (1.87-5.02)	198.03 (120.52-310.14)	-0.23 (-0.37 to -0.09)
North Macedonia	713.99 (206.05-1131.36)	38.74 (11.29-62.85)	-0.1 (-0.13 to -0.07)	42.42 (30.51-55.49)	1.57 (1.15-2.05)	-0.76 (-0.97 to -0.54)	3648.98 (2136.39-6008.6)	158.68 (89.25-267.01)	-1.06 (-1.2 to -0.93)
Northern Mariana Islands	17.5 (4.1-28.68)	38.18 (8.98-62.66)	-0.35 (-0.44 to -0.27)	0.29 (0.21-0.35)	0.58 (0.42-0.72)	2.97 (2.34 to 3.61)	61.89 (25.8-111.87)	129.25 (52.95-234.51)	-0.12 (-0.24 to -0.01)
Norway	3339.05 (2025.21-4611.4)	67.39 (40.53-93.18)	-0.01 (-0.04 to 0.01)	107 (98.47-114.24)	1.36 (1.27-1.44)	0.32 (-0.13 to 0.77)	8411 (5449.05-13010.15)	142.91 (91.46-227.93)	-0.37 (-0.55 to -0.18)
Oman	2297.39 (683.37-3650.42)	49.91 (14.84-79.55)	0.74 (0.65 to 0.82)	14.98 (10.33-18.83)	0.42 (0.29-0.52)	-0.97 (-1.21 to -0.73)	4681.27 (1694.82-8985.25)	105.99 (39.35-202.55)	-0.28 (-0.36 to -0.2)
Pakistan	91540.56 (44757.91-138268.82)	36.1 (18.01-54.04)	0.12 (0.04 to 0.19)	7866.63 (6097.82-10253.09)	4.4 (3.14-5.82)	-0.1 (-0.27 to 0.06)	702773.87 (537939.92-933246.95)	298.35 (227.74-395.59)	-0.18 (-0.29 to -0.07)
Palau	7.03 (1.98-11.22)	42.97 (11.81-69.72)	0.06 (0.02 to 0.11)	0.35 (0.27-0.45)	1.95 (1.5-2.47)	-0.24 (-0.28 to -0.19)	42.06 (23.72-64.92)	237.87 (134.17-361.77)	-0.24 (-0.3 to -0.19)
Palestine	2497.67 (774.38-4441.73)	44.25 (13.95-77.63)	0.29 (0.23 to 0.35)	71.02 (59.62-92.18)	1.74 (1.47-2.15)	-1.79 (-1.85 to -1.74)	8579.37 (4988.03-13509.23)	161.71 (95.13-252.51)	-1.24 (-1.28 to -1.21)
Panama	3013.77 (847.48-4865.96)	70.77 (19.88-113.99)	0.69 (0.66 to 0.72)	63.12 (50.47-75.9)	1.45 (1.16-1.74)	-0.29 (-0.39 to -0.19)	9829.23 (4550.33-17396.45)	228.28 (105.91-403.12)	0.14 (0.08 to 0.2)
Papua New Guinea	3172.32 (774.51-5778.58)	27.88 (6.62-50.78)	-0.01 (-0.03 to 0.01)	175.73 (117.78-263.04)	1.77 (1.18-2.67)	0.6 (0.54 to 0.66)	19695.76 (10731.67-30526.85)	183.74 (98.49-286.24)	0.26 (0.22 to 0.3)
Paraguay	3807.88 (1252.78-6274.74)	52.39 (17.31-86.1)	0.3 (0.27 to 0.33)	102.39 (72.46-134.22)	1.51 (1.06-1.98)	0.34 (0.23 to 0.45)	13853.32 (7142.79-23065.71)	192.49 (99.48-319.13)	-0.16 (-0.2 to -0.13)
Peru	24465.91 (6968.55-40938.04)	67.82 (18.93-113.03)	-0.54 (-0.73 to -0.34)	293.71 (220.56-404.17)	0.81 (0.61-1.11)	-3.1 (-3.32 to -2.88)	69128.08 (27760.75-128959.16)	189.26 (75.76-353.73)	-2.25 (-2.48 to -2.03)
Philippines	41855.46 (29016.05-56497.05)	36.4 (25.48-48.63)	0.09 (0.06 to 0.13)	383.1 (286.77-454.9)	0.38 (0.3-0.45)	-0.01 (-0.09 to 0.07)	116067.57 (78784.27-164451.42)	103.29 (70.53-144.86)	-0.06 (-0.1 to -0.03)
Poland	12308.21 (8036.64-16538.42)	39.07 (26.09-53.66)	0.51 (0.45 to 0.57)	1160.76 (940.75-1325.76)	2.15 (1.74-2.46)	2.19 (1.97 to 2.42)	74691.21 (55929.27-98329.59)	174.29 (126.45-233.62)	0.65 (0.55 to 0.75)
Portugal	4591.96 (1220.4-7125.55)	47.74 (12.72-76.44)	0.29 (0.23 to 0.35)	326.37 (281.44-360)	1.63 (1.43-1.8)	1.07 (0.81 to 1.33)	14936.44 (9267.43-24384.64)	119.23 (71.02-197.12)	-0.2 (-0.33 to -0.06)
Puerto Rico	1818.14 (530.98-2911.11)	62.97 (18.35-100.1)	-0.43 (-0.52 to -0.34)	57.42 (46.67-68.97)	1.18 (0.97-1.42)	-2.95 (-3.21 to -2.68)	5877.59 (2723.83-10579.3)	164.6 (74.25-304.26)	-2.06 (-2.2 to -1.92)
Qatar	1476.97 (485.07-2385.18)	55.4 (17.93-87.5)	-0.29 (-0.34 to -0.24)	12.82 (9.51-19.38)	0.63 (0.49-0.82)	-3.12 (-3.3 to -2.93)	3126.53 (1242.12-6046.08)	119.15 (48.41-232.52)	-2.06 (-2.13 to -2)
Republic of Korea	21403.56 (5486.39-32888.18)	47.72 (12.08-74.33)	-0.22 (-0.29 to -0.15)	564.47 (422.49-642.33)	0.85 (0.68-0.97)	-2.12 (-2.3 to -1.95)	56166.19 (26890.45-106018.84)	108.7 (51.91-201.41)	-1.91 (-2.04 to -1.78)
Republic of Moldova	977.09 (291.14-1613.24)	32.2 (9.37-54.43)	-0.58 (-0.64 to -0.53)	71.92 (58.84-87.21)	1.66 (1.35-2.03)	-2.83 (-3.41 to -2.24)	5543.19 (3541.87-8419.64)	149.29 (93.51-228.13)	-2.4 (-2.7 to -2.09)
Romania	6525.75 (1924.78-10400.84)	42.13 (12.64-68.08)	-0.01 (-0.06 to 0.05)	416.4 (321.76-495.78)	1.7 (1.3-2.04)	-0.48 (-0.75 to -0.21)	35052.42 (19816.48-56061.76)	180.1 (100.72-290.72)	-0.91 (-1.07 to -0.76)
Russian Federation	41005.34 (27957.9-54874.89)	32.02 (21.63-43.91)	-0.47 (-0.5 to -0.44)	838.48 (754.04-918.93)	0.46 (0.41-0.51)	-3.49 (-4.49 to -2.49)	108612.73 (71621.36-162867.51)	72.78 (48.15-110.55)	-2.25 (-2.51 to -1.99)
Rwanda	7910.73 (1724.31-14528.31)	54.69 (11.94-98.7)	-0.28 (-0.33 to -0.23)	636.46 (466.53-904.23)	6.84 (5.15-9.68)	-1.69 (-1.91 to -1.48)	51635.59 (34411.63-75020.29)	405.83 (275.97-585.07)	-1.58 (-1.76 to -1.39)
Saint Kitts and Nevis	38.82 (12.16-63.49)	71.64 (22.51-116.33)	-0.26 (-0.29 to -0.23)	1.45 (1.17-1.76)	2.29 (1.88-2.77)	-2.72 (-3.12 to -2.33)	162.52 (87.76-270.4)	269.34 (142.62-448.26)	-2.12 (-2.37 to -1.87)
Saint Lucia	106.91 (28.59-177.79)	65.73 (17.08-111.31)	-0.11 (-0.15 to -0.07)	5.74 (4.68-6.93)	2.77 (2.25-3.33)	-2.01 (-2.31 to -1.72)	519.51 (299.19-853.28)	279.76 (158.29-458.55)	-1.36 (-1.53 to -1.19)
Saint Vincent and the Grenadines	69.01 (17.04-112.98)	63.85 (15.73-104.35)	0.16 (0.09 to 0.23)	3.93 (3.36-4.52)	3.16 (2.7-3.65)	-0.92 (-1.21 to -0.64)	352.17 (210.89-523.56)	301.51 (179.37-451.75)	-0.69 (-0.84 to -0.54)
Samoa	80.16 (24.24-136.05)	35.21 (10.96-59.38)	0.12 (0.05 to 0.19)	2.25 (1.66-3.07)	1.18 (0.88-1.62)	-0.35 (-0.41 to -0.29)	340.96 (174.6-566.39)	163.68 (85.06-268.28)	-0.22 (-0.3 to -0.14)
San Marino	13.49 (3.93-20.41)	50.92 (14.51-78.47)	-0.01 (-0.09 to 0.07)	0.07 (0.04-0.09)	0.12 (0.07-0.16)	-0.95 (-1.26 to -0.64)	21.72 (6.69-47.21)	66.98 (20.28-146.49)	-0.4 (-0.5 to -0.3)
Sao Tome and Principe	140.52 (40.88-242.86)	61.26 (17.79-104.1)	0.66 (0.62 to 0.69)	5.76 (4.03-7.95)	3.39 (2.42-4.52)	0.43 (0.25 to 0.61)	604.11 (302.99-953.05)	292.23 (152.28-457.56)	0.37 (0.24 to 0.49)
Saudi Arabia	24102.26 (6271.09-39558.09)	67.05 (17.57-107.39)	0.78 (0.73 to 0.83)	542.67 (328.9-730.66)	1.51 (1.06-1.9)	-1.48 (-1.58 to -1.38)	80462.02 (37740.63-144059.11)	211.67 (98.96-386.45)	-0.68 (-0.74 to -0.62)
Senegal	9736.22 (2077.67-18156.47)	56.34 (12.03-104.72)	0.16 (0.04 to 0.29)	538.63 (376.42-725.74)	4.63 (3.25-6.22)	0.92 (0.72 to 1.13)	50423.37 (29473.86-77321.27)	347.59 (211.6-520.39)	0.49 (0.38 to 0.6)
Serbia	3444.05 (980.04-5512.9)	45.05 (12.51-72.95)	-0.1 (-0.19 to -0.02)	169.6 (123.29-208.75)	1.41 (1.08-1.71)	-1.17 (-1.23 to -1.1)	14774.64 (7749.81-26085.44)	153.17 (81.03-270.18)	-1.27 (-1.35 to -1.2)
Seychelles	41.24 (12.24-70.28)	42.02 (12.33-72)	0.33 (0.27 to 0.39)	1.17 (0.9-1.41)	1.02 (0.78-1.22)	-0.91 (-1.07 to -0.75)	155.54 (72.51-264.69)	146.43 (65.44-254.5)	-0.39 (-0.47 to -0.32)
Sierra Leone	4916.43 (973.7-9069.75)	49.82 (10.04-92.46)	0.04 (-0.04 to 0.12)	254.18 (156.14-359.93)	4.04 (2.51-5.67)	0.49 (0.38 to 0.61)	24982.23 (13070.87-38675.82)	304.18 (166.79-454.22)	0.15 (0.04 to 0.27)
Singapore	2098.62 (603.31-3370.28)	42.99 (12.19-69.1)	0.47 (0.39 to 0.55)	28.58 (25.26-32.02)	0.46 (0.41-0.51)	-0.43 (-0.81 to -0.05)	4419.56 (1833.92-9155.85)	81.96 (34.9-166.24)	-0.3 (-0.36 to -0.24)
Slovakia	2147.87 (622.83-3531.85)	46.02 (13.5-76.59)	0.16 (0.05 to 0.26)	135.53 (103.2-167.04)	1.94 (1.52-2.37)	-0.49 (-0.62 to -0.35)	11740.08 (6646.44-19713.03)	199.79 (110.2-338.87)	-0.53 (-0.63 to -0.42)
Slovenia	718.08 (221.45-1131.7)	41.85 (13.04-68.07)	-0.36 (-0.41 to -0.3)	43.83 (30.78-55.95)	1.39 (0.96-1.78)	-0.73 (-1.04 to -0.41)	3202.35 (1764.86-5438.82)	140.88 (74.88-247.01)	-1.29 (-1.41 to -1.16)
Solomon Islands	225.16 (51.07-410.03)	30.39 (7.03-54.97)	0.13 (0.08 to 0.18)	11.21 (7.64-16.04)	1.82 (1.24-2.63)	0.27 (0.21 to 0.33)	1321.6 (742.68-2091.16)	193.79 (108.02-306.78)	0.07 (0.01 to 0.13)
Somalia	9107.57 (1372.48-19865.51)	35.54 (5.55-76.22)	-0.36 (-0.43 to -0.29)	1291.44 (796.18-2109.48)	10.32 (6.67-16.87)	0.11 (0.04 to 0.17)	94814.07 (56204.64-146348.14)	505.54 (305.5-770.07)	0.02 (-0.07 to 0.11)
South Africa	33214.13 (20311.08-46183.08)	58.7 (35.79-81.51)	-0.3 (-0.46 to -0.13)	1179.3 (1005.95-1356.38)	2.11 (1.78-2.42)	-0.23 (-0.46 to 0)	132324.68 (96363.81-178256.05)	230.96 (168.24-311.54)	-0.69 (-0.87 to -0.51)
South Sudan	5621.65 (1248.12-10952.9)	50.57 (11.29-97.85)	-0.35 (-0.43 to -0.26)	563.29 (394.67-772.31)	9.01 (6.45-12.48)	-0.22 (-0.38 to -0.06)	44305.96 (30067.85-63011.9)	490.09 (339.61-688.17)	-0.07 (-0.26 to 0.12)
Spain	17767.25 (5789.5-28705.94)	43.98 (13.67-71.8)	0.53 (0.4 to 0.67)	817.62 (690.98-915.23)	0.96 (0.83-1.06)	1.46 (1.27 to 1.65)	46938.29 (25478.09-86310.08)	92.26 (47.3-176.5)	0.3 (0.14 to 0.46)
Sri Lanka	11227.89 (2759.66-18556.81)	52.78 (12.83-86.89)	0.13 (0.1 to 0.16)	346.7 (233.94-485.7)	1.48 (1.02-2.06)	-2.82 (-3.1 to -2.54)	44289.15 (19809.99-77271.02)	197.11 (87.66-345.72)	-1.55 (-1.69 to -1.4)
Sudan	19217.67 (5103.42-33204.48)	39.08 (10.31-67.12)	0.45 (0.4 to 0.49)	623.27 (420.7-853.2)	1.55 (1.1-2.09)	-1.41 (-1.51 to -1.32)	79238.09 (48141.81-122130.59)	167.69 (101.5-256.66)	-0.95 (-1.03 to -0.88)
Suriname	375.52 (121.63-605.66)	66.6 (21.61-107.67)	0.29 (0.27 to 0.31)	15.66 (12.06-19.76)	2.6 (2.01-3.28)	-0.96 (-1.07 to -0.85)	1760.27 (1024.58-2766.41)	301.79 (175.64-474.23)	-0.53 (-0.63 to -0.44)
Sweden	3688.63 (1572.52-5653.72)	39.86 (16.87-62.89)	-0.31 (-0.35 to -0.26)	117.58 (102.68-133.76)	0.79 (0.69-0.9)	-0.83 (-1.08 to -0.58)	9556.76 (5507.51-16369.88)	87.42 (49.67-149.72)	-0.84 (-0.96 to -0.73)
Switzerland	4415.15 (1265.53-6831.22)	54.11 (14.91-85.33)	-0.19 (-0.22 to -0.15)	175.43 (147.31-202.82)	1.15 (0.98-1.32)	0.22 (0.12 to 0.32)	11013.5 (5993.57-19564.09)	109.75 (57.27-204.04)	-0.51 (-0.58 to -0.45)
Syrian Arab Republic	5147.06 (1472.93-8530.67)	37.95 (10.64-62.44)	0.22 (0.09 to 0.35)	145.46 (100.45-201.49)	1.16 (0.79-1.59)	-0.69 (-1.12 to -0.26)	17115.81 (9950.8-28227.92)	127.8 (76.29-205.8)	-0.53 (-0.71 to -0.35)
Taiwan	7721.05 (2127.33-11773.89)	34.96 (9.32-55.36)	0.35 (0.29 to 0.42)	299.03 (270.97-325.57)	0.96 (0.87-1.05)	0.58 (0.34 to 0.82)	32139.58 (15707.56-57965)	126.68 (61.9-232.03)	-0.08 (-0.17 to 0.01)
Tajikistan	4868.55 (1337.86-8427.73)	44.97 (12.25-77.19)	-0.46 (-0.54 to -0.38)	467.26 (344.12-621.46)	4.57 (3.36-6.07)	-0.5 (-0.72 to -0.27)	42943.84 (28868.6-60112.3)	406.95 (269.12-571.99)	-0.66 (-0.8 to -0.52)
Thailand	25161.64 (7863.43-40960.04)	43.04 (13.94-71.16)	0.85 (0.81 to 0.88)	989.39 (754.96-1241.22)	1.19 (0.89-1.5)	-0.66 (-0.81 to -0.51)	103216.31 (51403.9-180178.64)	152.34 (74.77-270.89)	0.15 (0.1 to 0.2)
Timor-Leste	521.61 (145.33-918.03)	34.24 (9.66-60.25)	0.58 (0.5 to 0.67)	7.09 (4.51-14.07)	0.61 (0.38-1.28)	-0.87 (-1.12 to -0.62)	1733.85 (668.38-3198.67)	121.13 (45.61-221.02)	-0.09 (-0.22 to 0.03)
Togo	5184.07 (1165.68-9782.45)	57.03 (12.77-105.21)	-0.65 (-0.81 to -0.49)	241.17 (153.35-335.07)	3.92 (2.55-5.43)	0.54 (0.44 to 0.65)	24271.33 (13212.99-38099.2)	312.94 (177.85-479.87)	-0.44 (-0.52 to -0.35)
Tokelau	0.44 (0.1-0.79)	33.05 (7.71-59.43)	0.17 (0.12 to 0.22)	0.03 (0.02-0.03)	2.03 (1.66-2.62)	-0.27 (-0.74 to 0.2)	2.88 (1.85-4.15)	216.79 (140.8-311.52)	-0.19 (-0.49 to 0.1)
Tonga	37.06 (11.49-59.67)	32.86 (10.16-52.77)	0.07 (0.03 to 0.12)	0.97 (0.72-1.34)	1.01 (0.74-1.38)	-0.43 (-0.53 to -0.32)	147.46 (77.56-240)	141.68 (75.7-229.19)	-0.26 (-0.35 to -0.16)
Trinidad and Tobago	933.38 (264.59-1536.8)	72.26 (20.48-118.96)	0.13 (0.07 to 0.19)	38 (28.49-47.87)	2.36 (1.78-2.96)	-1.91 (-2.14 to -1.67)	4140.19 (2230.75-7015.08)	287.44 (153.61-486.49)	-1.09 (-1.21 to -0.97)
Tunisia	4598.49 (1332.02-7796.48)	42.07 (12.07-71.3)	0.45 (0.36 to 0.54)	112.67 (82.09-160.78)	0.97 (0.7-1.37)	-1.81 (-1.85 to -1.77)	13330.8 (6992.15-23206.68)	118.05 (61.59-205.23)	-1.31 (-1.35 to -1.27)
Türkiye	43973.07 (13647.14-72075.75)	57.02 (17.76-93.34)	0.63 (0.56 to 0.7)	1478.9 (1182.93-1818.33)	1.78 (1.43-2.16)	-2.34 (-2.38 to -2.3)	153903.59 (87880.07-251337.38)	193.51 (111.17-316.23)	-1.84 (-1.92 to -1.77)
Turkmenistan	2504.13 (598.31-4328.01)	47.49 (11.33-81.92)	0.47 (0.42 to 0.51)	148.36 (99.93-206.41)	2.84 (1.92-3.95)	0.38 (-0.09 to 0.86)	16092.13 (9040.44-25359.96)	305.19 (170.1-480.83)	0.24 (-0.03 to 0.5)
Tuvalu	4.19 (1.2-7.17)	33.19 (9.49-56.56)	0.02 (-0.04 to 0.07)	0.16 (0.12-0.21)	1.33 (1.03-1.74)	-0.61 (-0.64 to -0.59)	20.95 (11.4-32.63)	168.3 (91.57-261.86)	-0.53 (-0.58 to -0.48)
Uganda	32443.05 (6988.58-58736.43)	64.12 (13.38-115.21)	0.23 (0.14 to 0.33)	1553.36 (1162.61-2046)	5.69 (4.35-7.44)	-0.57 (-0.66 to -0.48)	156047.74 (98147.5-235169.57)	375.73 (247.06-555.56)	-0.22 (-0.3 to -0.13)
Ukraine	12868.13 (4047.03-20912.62)	36.47 (11.16-59.36)	-0.54 (-0.59 to -0.49)	424.58 (303.47-552.81)	0.88 (0.64-1.14)	-2.69 (-3.26 to -2.11)	49969.61 (26970.89-82168.04)	115.76 (62.04-193.99)	-1.92 (-2.23 to -1.62)
United Arab Emirates	5334.62 (1734.98-8863.41)	64.43 (22-105.63)	-0.2 (-0.3 to -0.11)	48.23 (37.7-60.49)	0.85 (0.63-1.06)	-2.06 (-2.46 to -1.66)	15054.1 (5804.96-28385.2)	177.39 (74.64-330.1)	-1.85 (-2.04 to -1.67)
United Kingdom	42922.06 (29132.61-57868.77)	71.96 (49.02-97.76)	0.29 (0.21 to 0.38)	1067.04 (971.85-1131.21)	1.2 (1.09-1.28)	-0.71 (-1.06 to -0.37)	102391.8 (70293.83-151733.78)	148.2 (101.85-221.13)	-0.51 (-0.7 to -0.33)
United Republic of Tanzania	40002.03 (9567.64-72526.69)	60.72 (14.63-108.54)	0.17 (0.07 to 0.28)	2889.81 (2208.69-3715.19)	7.04 (5.48-9.21)	-0.81 (-0.86 to -0.75)	254132.22 (164749.38-371644.38)	445.27 (294.82-641.56)	-0.36 (-0.42 to -0.31)
United States of America	131613.43 (82177.93-180639.93)	42.91 (27.14-60.73)	0.45 (0.22 to 0.69)	3425.56 (3214.34-3569.6)	0.79 (0.75-0.81)	1.41 (0.92 to 1.9)	386334.54 (245396.38-600739.29)	111.21 (69.96-173.72)	0.42 (0.23 to 0.61)
United States Virgin Islands	50.24 (15.63-78.43)	66.36 (20.17-107.56)	-0.07 (-0.2 to 0.07)	1.36 (0.95-1.78)	1.63 (1.11-2.16)	0.11 (-0.2 to 0.42)	193.22 (90.03-330.15)	231.82 (118.44-389.82)	-0.07 (-0.19 to 0.05)
Uruguay	1778.78 (421.02-2893.42)	56.27 (13.4-91.48)	0.57 (0.5 to 0.63)	73.3 (67.33-79.49)	1.76 (1.62-1.9)	1 (0.83 to 1.18)	6416.56 (3532.33-10629.23)	183.68 (100.54-305.47)	0.35 (0.21 to 0.48)
Uzbekistan	17179 (4639.11-27932.3)	49.41 (13.63-79.92)	0.3 (0.14 to 0.46)	902.37 (761.18-1067.31)	2.63 (2.22-3.11)	-0.79 (-1.21 to -0.36)	103303.19 (65441.79-160864.56)	297.87 (186.32-466.5)	-0.55 (-0.89 to -0.21)
Vanuatu	103.55 (23.26-180.54)	30.85 (7.02-53.41)	0.13 (0.1 to 0.16)	4.55 (3.39-6.09)	1.56 (1.15-2.1)	0.09 (-0.02 to 0.21)	569.62 (299.48-891.9)	182.19 (96.15-284.89)	0.06 (-0.02 to 0.14)
Venezuela (Bolivarian Republic of)	16558.55 (5129.45-28252.68)	64.57 (19.99-110.86)	-0.07 (-0.17 to 0.02)	610.88 (452.11-776.43)	2.21 (1.64-2.8)	-0.23 (-0.54 to 0.08)	70431.78 (36755.28-122187.67)	265.07 (138.8-462.21)	-0.6 (-0.78 to -0.41)
Viet Nam	32977.81 (7579.79-56039.6)	34.62 (8-58.88)	0.95 (0.83 to 1.07)	78.5 (14.97-325.82)	0.08 (0.01-0.32)	0.05 (-1.14 to 1.26)	77437.59 (17792.18-164318.26)	79.12 (18.13-169.2)	0.61 (0.33 to 0.89)
Yemen	12929.54 (2526.36-24018.1)	33.31 (6.51-61.36)	0.28 (0.15 to 0.4)	441.14 (274.01-611.85)	1.5 (1.03-2.05)	-1.04 (-1.14 to -0.93)	54108.64 (28193.68-85438.72)	148.19 (79.86-235.64)	-0.8 (-0.92 to -0.68)
Zambia	16066.5 (4093.06-28827.65)	73.08 (18.7-128.96)	-0.01 (-0.12 to 0.11)	1705.84 (1215-2358.24)	12.94 (9.47-17.08)	1.82 (1.37 to 2.27)	134735.03 (88957.87-188669.57)	746.45 (505.83-1031.36)	1.25 (1 to 1.5)
Zimbabwe	8259.66 (1964.22-15309.6)	50.16 (11.77-91.62)	-0.1 (-0.25 to 0.05)	529.79 (341.28-773.46)	4.51 (3.02-6.29)	0.87 (0.66 to 1.09)	50410.82 (29431.14-75588.74)	346.54 (205.51-517.01)	0.66 (0.49 to 0.82)
