# Supplementary material for: Global, Regional, and National Burden of Idiopathic Epilepsy: Temporal Trends and Drivers from 1990 to 2021
Source: Research Square preprint supplement (doi:10.21203/rs.3.rs-7019365/v1), 2025-08-08
Supplement: Supplementary file 6 [file dd7f7eb426676d22b5168bb3.xlsx]

## Sheet: 21regions_Incidence_decompositi
location	Population_Growth	Age_Structure	Rate_Change
Western Europe	14.067	-6.44542	14.8512
East Asia	22.1649	-10.3397	26.3293
Southeast Asia	51.4139	-18.294	21.923
Australasia	53.2846	-11.1931	-0.811237
Western Sub-Saharan Africa	155.058	-3.74503	23.2075
South Asia	70.9308	-13.6735	12.8275
Oceania	113.257	-6.77842	-3.03019
Southern Latin America	37.9252	-9.93163	12.3676
High-income North America	32.1898	-8.84103	27.4238
Central Asia	39.1727	-11.3144	9.11265
Caribbean	35.5314	-10.9903	0.0706221
North Africa and Middle East	85.7613	-21.0357	15.847
High-income Asia Pacific	7.48789	-12.1593	10.7525
Central Europe	-7.40577	-12.1792	4.39423
Central Sub-Saharan Africa	151.364	-6.85594	3.07303
Eastern Sub-Saharan Africa	125.419	-6.99691	12.7053
Central Latin America	55.9395	-16.26	-5.54717
Eastern Europe	-8.2092	-8.19239	-7.46208
Andean Latin America	75.8013	-12.316	2.30956
Southern Sub-Saharan Africa	54.6114	-9.4276	1.34726
Tropical Latin America	50.1558	-16.7638	-11.2234
