# Supplementary material for: Global, Regional, and National Burden of Idiopathic Epilepsy: Temporal Trends and Drivers from 1990 to 2021
Source: Research Square preprint supplement (doi:10.21203/rs.3.rs-7019365/v1), 2025-08-08
Supplement: Supplementary file 7 [file ec10d5f66cb7c697b5aa1b80.xlsx]

## Sheet: ASRs_M_F_ratio-单元格内换行
age	ASIR/100,000 (95% UI)			M/F 2021	M/F 1990	ASMR (95% UI)			M/F 2021	M/F 1990	ASDR (95% UI)			M/F 2021	M/F 1990
	Male	Female	Both			Male	Female	Both			Male	Female	Both
<1	95.04 (62.65–134.72)	78.88 (50.16–111.36)	87.23 (56.96–123.4)	1.2 (1.19 – 1.22)	1.22 (1.2 – 1.23)	3.6 (2.3–4.62)	3.15 (1.91–4.2)	3.38 (2.34–4.24)	1.14 (1.08 – 1.21)	0.93 (0.89 – 0.98)	390.37 (269.83–486.11)	351.81 (237.02–448.98)	371.73 (275.13–456.07)	1.11 (1.1 – 1.12)	0.96 (0.95 – 0.96)
45692	68.45 (42.65–102.23)	60.33 (36.6–91.97)	64.53 (39.67–97.49)	1.13 (1.13 – 1.14)	1.15 (1.14 – 1.16)	0.93 (0.57–1.22)	0.6 (0.38–0.8)	0.77 (0.5–1)	1.56 (1.45 – 1.67)	0.94 (0.89 – 0.99)	180.04 (132.44–240.18)	142.95 (104.6–198.11)	162.11 (121.03–219.15)	1.26 (1.25 – 1.27)	1.03 (1.02 – 1.03)
45786	58.58 (33.21–91.38)	54.77 (30.57–85.84)	56.74 (31.92–88.23)	1.07 (1.06 – 1.08)	1.09 (1.08 – 1.09)	0.67 (0.5–0.81)	0.42 (0.3–0.53)	0.55 (0.43–0.65)	1.58 (1.48 – 1.69)	1.31 (1.24 – 1.38)	164.55 (117.61–236.56)	135.31 (93.27–201.44)	150.4 (106.67–218.62)	1.22 (1.21 – 1.22)	1.19 (1.19 – 1.19)
45944	57.38 (33.94–94.49)	53.2 (30.1–88.39)	55.35 (32.2–91.97)	1.08 (1.07 – 1.09)	1.07 (1.06 – 1.08)	0.85 (0.66–1.03)	0.72 (0.5–0.89)	0.79 (0.63–0.93)	1.19 (1.13 – 1.26)	1.24 (1.17 – 1.3)	180.96 (129.89–261.34)	162.21 (111.38–241.43)	171.88 (122.25–252.18)	1.12 (1.11 – 1.12)	1.15 (1.15 – 1.16)
15-19	54.79 (31.26–85.22)	48.59 (26.37–77.52)	51.77 (29.09–81.69)	1.13 (1.12 – 1.14)	1.07 (1.06 – 1.08)	1.84 (1.46–2.35)	1.33 (0.95–1.8)	1.59 (1.3–1.88)	1.39 (1.33 – 1.44)	1.49 (1.43 – 1.55)	250.95 (192.26–329.8)	202.81 (149.08–277.13)	227.52 (173.58–301.11)	1.24 (1.23 – 1.24)	1.29 (1.28 – 1.29)
20-24	48.62 (25.39–74.51)	42.83 (21.99–68.38)	45.77 (23.61–71.47)	1.14 (1.13 – 1.14)	1.07 (1.06 – 1.08)	1.92 (1.5–2.47)	1.33 (0.88–1.61)	1.63 (1.3–1.91)	1.44 (1.38 – 1.5)	1.56 (1.5 – 1.63)	245 (185.46–316.67)	191.59 (139.31–256.21)	218.72 (165.81–287.99)	1.28 (1.27 – 1.28)	1.32 (1.32 – 1.33)
25-29	39.47 (21.12–60.03)	35.88 (18.5–56.03)	37.69 (19.92–58.28)	1.1 (1.09 – 1.11)	1.08 (1.07 – 1.09)	1.96 (1.52–2.29)	1.14 (0.77–1.4)	1.55 (1.23–1.79)	1.72 (1.64 – 1.79)	1.61 (1.54 – 1.69)	225.71 (174.41–287.33)	162.96 (116.88–216.51)	194.68 (147.92–249.82)	1.39 (1.38 – 1.39)	1.33 (1.33 – 1.34)
30-34	34.28 (17.31–55.17)	31.41 (15.37–50.91)	32.86 (16.23–52.96)	1.09 (1.08 – 1.1)	1.09 (1.07 – 1.1)	1.99 (1.53–2.41)	1.2 (0.82–1.44)	1.6 (1.3–1.85)	1.66 (1.6 – 1.73)	1.61 (1.53 – 1.68)	203.59 (158.52–257.35)	147.98 (106.61–194.37)	176.09 (134.31–224.54)	1.38 (1.37 – 1.38)	1.35 (1.34 – 1.35)
35-39	33.59 (18.39–51.49)	30.41 (16.17–46.96)	32.01 (17.23–49.26)	1.1 (1.09 – 1.11)	1.1 (1.09 – 1.11)	2.24 (1.67–2.63)	1.16 (0.83–1.35)	1.71 (1.37–1.91)	1.93 (1.85 – 2.01)	1.74 (1.66 – 1.82)	199.91 (153.6–252.86)	133.33 (96.5–178.67)	166.93 (127.77–214.31)	1.5 (1.49 – 1.51)	1.42 (1.42 – 1.43)
40-44	31.98 (19.36–50.86)	29.33 (17.14–46.5)	30.67 (18.24–48.81)	1.09 (1.08 – 1.1)	1.1 (1.09 – 1.12)	2.33 (1.81–2.79)	1.16 (0.8–1.35)	1.75 (1.41–1.96)	2 (1.91 – 2.09)	1.75 (1.66 – 1.85)	188.13 (146.26–240.45)	123.15 (88.67–167.44)	155.9 (120.25–201.3)	1.53 (1.52 – 1.53)	1.43 (1.42 – 1.43)
45-49	29.01 (18.74–43.75)	27.5 (17.61–41.59)	28.26 (18.27–42.75)	1.05 (1.04 – 1.07)	1.09 (1.07 – 1.1)	2.36 (1.88–2.83)	0.97 (0.7–1.1)	1.67 (1.35–1.92)	2.44 (2.33 – 2.56)	2.18 (2.06 – 2.32)	171.85 (135.65–216.09)	105.23 (74.75–144.14)	138.69 (105.67–178.76)	1.63 (1.63 – 1.64)	1.58 (1.57 – 1.59)
50-54	27.6 (15.97–42.56)	25.95 (14.79–40.22)	26.78 (15.4–41.46)	1.06 (1.05 – 1.08)	1.11 (1.09 – 1.12)	2.11 (1.65–2.41)	1.23 (0.8–1.43)	1.67 (1.33–1.87)	1.72 (1.64 – 1.8)	1.67 (1.57 – 1.77)	147.71 (115.15–193.04)	109.74 (79.8–154.83)	128.68 (98.5–172.13)	1.35 (1.34 – 1.35)	1.36 (1.35 – 1.37)
55-59	27.52 (16.13–46.87)	24.66 (14.01–43.26)	26.07 (15.11–44.9)	1.12 (1.1 – 1.13)	1.14 (1.12 – 1.16)	2.49 (1.94–2.84)	1.37 (0.92–1.56)	1.92 (1.51–2.11)	1.81 (1.73 – 1.9)	1.94 (1.82 – 2.07)	155.98 (122.21–204.91)	113.8 (82.46–164.15)	134.56 (102.19–185.56)	1.37 (1.36 – 1.38)	1.45 (1.44 – 1.46)
60-64	28.44 (16.68–44.82)	24.55 (14.15–39.54)	26.44 (15.51–41.98)	1.16 (1.14 – 1.17)	1.18 (1.15 – 1.2)	2.7 (2.17–3.01)	1.55 (1.04–1.76)	2.11 (1.71–2.32)	1.74 (1.66 – 1.83)	1.85 (1.73 – 1.98)	165.54 (123.51–224.79)	124.59 (89.42–177.67)	144.49 (106.59–201.38)	1.33 (1.32 – 1.34)	1.4 (1.39 – 1.41)
65-69	28.03 (16.36–41.01)	24.08 (13.44–36.18)	25.97 (14.67–38.53)	1.16 (1.15 – 1.18)	1.21 (1.18 – 1.24)	3.16 (2.46–3.56)	2.08 (1.42–2.38)	2.6 (2.05–2.85)	1.52 (1.45 – 1.59)	1.75 (1.64 – 1.88)	176.66 (128.9–241.57)	140.08 (101.98–194.35)	157.56 (115.5–215.99)	1.26 (1.25 – 1.27)	1.37 (1.36 – 1.38)
70-74	31.55 (18.26–45.91)	26.38 (14.82–39)	28.8 (16.48–42.11)	1.2 (1.18 – 1.22)	1.26 (1.23 – 1.3)	4.2 (3.28–4.77)	3.24 (2.14–3.7)	3.69 (2.92–4.05)	1.3 (1.24 – 1.36)	1.73 (1.61 – 1.85)	196.58 (143.06–270.28)	163.81 (118.82–225.02)	179.15 (132.7–245.14)	1.2 (1.19 – 1.21)	1.39 (1.37 – 1.4)
75-79	38.27 (22.26–57.54)	31.33 (17.57–47.73)	34.48 (19.67–52.18)	1.22 (1.2 – 1.24)	1.38 (1.34 – 1.42)	5.94 (4.83–6.78)	3.85 (2.75–4.3)	4.8 (3.95–5.24)	1.55 (1.47 – 1.62)	2.27 (2.1 – 2.45)	223.38 (164.91–306.36)	172.33 (121.29–239.6)	195.47 (140.53–269.98)	1.3 (1.29 – 1.31)	1.57 (1.55 – 1.59)
80-84	46.94 (29.1–67.9)	38.39 (22.85–56.5)	41.97 (25.44–61.45)	1.22 (1.2 – 1.25)	1.39 (1.34 – 1.45)	7.83 (6.5–8.75)	5.85 (4.24–6.64)	6.68 (5.41–7.33)	1.34 (1.27 – 1.41)	2 (1.83 – 2.19)	245.24 (176.15–333.54)	195.28 (138.05–267.64)	216.19 (155.05–295.76)	1.26 (1.24 – 1.27)	1.52 (1.5 – 1.54)
85-89	56.59 (31.06–90.1)	47.41 (24.91–77.06)	50.87 (27.29–82.36)	1.19 (1.16 – 1.23)	1.36 (1.29 – 1.43)	11.97 (9.97–13.38)	9 (6.48–10.44)	10.12 (7.97–11.31)	1.33 (1.25 – 1.41)	1.97 (1.75 – 2.21)	286.95 (210.74–389.68)	225.77 (158.73–311.36)	248.85 (178.29–342.02)	1.27 (1.26 – 1.29)	1.55 (1.52 – 1.59)
90-94	77.02 (40.12–125.98)	69.47 (34.92–117.83)	71.93 (36.52–120.57)	1.11 (1.07 – 1.15)	1.19 (1.09 – 1.3)	15.73 (13.4–17.68)	13.29 (9.78–15.49)	14.09 (11.09–15.83)	1.18 (1.09 – 1.28)	1.89 (1.54 – 2.31)	332.13 (239.25–466.28)	273.48 (193.94–380.59)	292.59 (208.34–409.1)	1.21 (1.19 – 1.24)	1.52 (1.46 – 1.59)
95+	109.06 (43.56–230.14)	105.82 (40.3–232.55)	106.71 (41.43–230.28)	1.03 (0.97 – 1.09)	1.04 (0.9 – 1.21)	20.44 (16.36–23.45)	20.03 (14.27–23.74)	20.14 (14.83–23.3)	1.02 (0.89 – 1.16)	1.71 (1.2 – 2.43)	411.38 (285.71–591.4)	367.93 (257.32–531.75)	379.98 (266.06–547.91)	1.12 (1.09 – 1.15)	1.42 (1.32 – 1.53)
